1

2

**Sublethal concentrations of clothianidin affect honey bee**

3

**colony behavior and interact with landscapes to affect colony**

4

**growth**

5

6

**William G. Meikle<sup>1\*</sup>, John J. Adamczyk<sup>2</sup>, Milagra Weiss<sup>1</sup>, Janie Ross<sup>2</sup>, Chris**

7

**Werle<sup>2</sup>, Eli Beren<sup>1</sup>**

8

9

<sup>1</sup>Carl Hayden Bee Research Center, USDA-ARS, 2000 E. Allen Rd, Tucson, AZ 85719 USA

10

<sup>2</sup>Southern Horticultural Laboratory, USDA-ARS, P. O. Box 287, Poplarville MS 39470 USA

11

12

\*Corresponding author

13

E-mail: [william.meikle@usda.gov](mailto:william.meikle@usda.gov)

## 14 **Abstract**

15 Honey bee colonies were exposed to sublethal concentrations (5 and 20 ppb) of clothianidin in sugar  
16 syrup, while control colonies were fed syrup with no pesticide. In addition to standard colony  
17 assessments of adult bees and brood, hive weight and internal temperature were monitored on a  
18 continuous basis at all sites. Experiments were conducted twice in Arizona, in successive years at the  
19 same site, and once in Mississippi, to examine the concomitant effects of weather and landscape. Adult  
20 bee masses at the Arizona site were significantly affected by clothianidin concentration. Newly-emerged  
21 bee dry weights, measured only at the Arizona site, were significantly lower for colonies fed 5 ppb  
22 clothianidin compared to the other groups. CO<sub>2</sub> concentration, also only measured at the Arizona site,  
23 was higher in colonies fed 20 ppb clothianidin. Neither daily hive weight change nor colony  
24 thermoregulation were affected by clothianidin exposure. The Mississippi site had higher rainfall, more  
25 diverse land use, and a different temperature regime, and bee colonies there did not show any effects of  
26 clothianidin. These results suggest that bee colonies in more stressful environments, such as the  
27 Sonoran desert of southern Arizona, are affected more by clothianidin exposure than colonies at sites  
28 with higher rainfall and more forage. Clothianidin was also found to be, like imidacloprid, highly stable in  
29 honey in the hive environment at least over several months. These results also showed that CO<sub>2</sub>  
30 concentration within the hive is potentially valuable in measuring the effects of stressors on bee health.

31

32 **Key words:** continuous hive weight, continuous hive temperature, hive CO<sub>2</sub> concentration, newly-  
33 emerged bees, neonicotinoid, pesticide residues.

34

35

36

## 37 Introduction

38 The exposure of honey bees to neonicotinoid pesticides is cosmopolitan [1]. Among neonicotinoid  
39 pesticides, thiomethoxam and its metabolite, clothianidin, are among the most popular and among the  
40 most dangerous for honey bees [2]. Clothianidin exposure has been found to affect grooming, hygienic  
41 behavior and neural gene expression [3-5]; memory processing [6]; drone semen quality [7]; and has  
42 been associated with increased P450 gene expression [8] indicating active detoxification. Clothianidin  
43 has been found in some studies to increase worker mortality [9-12], but not all studies [13] and when  
44 combined with  $\lambda$ -cyhalothrin has been shown to affect adult bee weight [8]. Exposure of honey bees to  
45 neonicotinoid pesticides along with other stressors, such as poor nutrition [14] or viruses [15] have been  
46 found particularly deleterious. Honey bees exposed to neonicotinoids have been found to have higher  
47 Varroa and Nosema densities [16-19] and reduced social immunity [11]. Imidacloprid, perhaps the most  
48 popular neonicotinoid, has been shown to affect brood production, queen replacement, foraging  
49 activity and winter survivorship when applied at sublethal concentrations in pollen diet [16]. When  
50 applied at very low (5 ppb) concentrations in sugar syrup, imidacloprid has been found to affect colony  
51 thermoregulation, foraging activity and adult bee maturation [20-22].

52 Sublethal pesticide exposure may affect aspects of honey bee ecology and social organization, but in  
53 the case of clothianidin, observations of negative impacts in managed manipulative field studies have  
54 not been consistent. Different workers have reported no effects of field-realistic concentrations of  
55 clothianidin on colony-level growth or behavior [23, 24], or on colony winter survival [25]. A large-scale  
56 study in Germany in which bee colonies were allowed to forage on oilseed crops treated with  
57 clothianidin found no effects on development of colony strength, brood success, honey yield or levels of  
58 pathogen infection [26]. Similarly, a field study involving “mini-colonies” challenged with both Nosema  
59 and clothianidin found no effect of clothianidin treatment on mortality or flight activity, and while the

60 lifespan of *Nosema* infected bees were reduced compared to non-infected bees a combination of  
61 pesticide and pathogen did not reveal any synergistic effect [27]. Similarly, experiments with  
62 imidacloprid have also had mixed results with respect to colony growth and thermoregulation [20, 21,  
63 28].

64 In this study three field experiments were conducted: two experiments at the same site in Arizona in  
65 successive years, and a third experiment at another site in Mississippi. Colony growth and activity were  
66 observed using several discrete and continuous measures in all the experiments. Additional variables  
67 were measured at the Arizona sites. The measures included those of interest to commercial beekeepers,  
68 such as the size of the adult bee and brood populations, as well as measures such as continuous hive  
69 weight and internal hive temperature that have successfully detected effects on bee colonies treated with  
70 sublethal concentrations of other compounds [22, 29].

71

## 72 **Materials and methods**

73 Two studies were conducted at the Santa Rita Experimental Range (SRER) south of Tucson, AZ  
74 (31°46'39"N, 110°51'46"W). The first study ran from May 2017 to March 2018 (hereafter SRER 2017-18)  
75 and the second study, from May 2018 to February 2019 (hereafter the SRER 2018-19). An additional  
76 study was conducted in Poplarville, MS (30°50'2.59"N, 89°32'52.45"W) from May 2018 to March 2019  
77 (hereafter POPL 2018-19). An overview of the response variables is provided (Table 1).

78

79 **Table 1.** Overview of experimental design and response variables. NEB = Newly Emerged Bee.

80

---

| Experiment | No.      | No. colony  | NEB  | Hive   | Hive  | Hive               | Pesticide | Varroa |
|------------|----------|-------------|------|--------|-------|--------------------|-----------|--------|
|            | colonies | assessments | mass | weight | temp. | [CO <sub>2</sub> ] | residues  | levels |

---

---

|              |    |   |     |     |     |     |     |     |
|--------------|----|---|-----|-----|-----|-----|-----|-----|
| SRER 2017-18 | 16 | 6 | yes | Yes | Yes | no  | yes | yes |
| SRER 2018-19 | 18 | 5 | yes | Yes | Yes | yes | yes | yes |
| POPL 2018-19 | 15 | 3 | no  | Yes | Yes | no  | no  | yes |

---

81

82 **Syrup preparation.** Control (0 ppb clothianidin) sucrose solution was mixed at 1:1 w:w (e.g. 500 g  
83 sucrose:500mL distilled water). Sucrose was added to distilled water in a 5-gallon bucket and mixed  
84 using an electric drill with a mortar mixing attachment until sugar was completely dissolved. Sucrose  
85 solution for solutions with clothianidin (PESTANAL, CAS# 210880-92-5) was mixed in the same manner  
86 but 50mL was withheld (thus “short”) to allow for the added volume of respective clothianidin spikes.  
87 500 g of sugar is dissolved in 450 mL of distilled water to allow for the addition of a 50 mL spike to  
88 achieve 1 kg of treatment solution. 950 g of “short” sugar solution was transferred to a Nalgene bottle,  
89 then the spike added to each individual bottle. A 10 ppm clothianidin stock solution was made by  
90 dissolving 1.0 mg of clothianidin, in 100 mL of distilled water, using a mixing bar but without heat. To  
91 avoid problems with static electricity, the clothianidin was weighed into a small, nonreactive plastic  
92 receptacles and those receptacles were placed in the solution, the solution stirred, and the receptacles  
93 removed after confirming the clothianidin had dissolved. For the 5 ppb solution: 0.5 mL of the stock  
94 solution was mixed into 49.5 mL of distilled water to achieve 50 mL of spike solution, which was then  
95 added to 950g of the short sucrose solution to achieve 1 kg of 5 ppb clothianidin syrup. For the 20 ppb  
96 solution (only in 2nd experiment) 2.0 mL of stock solution was mixed into 48.0 mL of distilled water, and  
97 that solution added to 950 g of the short solution to achieve 1 kg of 20 ppb clothianidin syrup.

98 **SRER 2017-18 experiment.** On 20 April, 2017, 24 bee colonies were established from packages (C.F.  
99 Koehnen & Sons, Inc., Glenn, CA 95943) of approximately 1 kg honey bees in painted, 10-frame, wooden  
100 Langstroth boxes (43.7 l capacity) (Mann Lake Ltd,) with migratory wooden lids. At establishment each  
101 colony was given 4 full or partial frames of capped honey, 2 frames of drawn but empty comb, 2 frames

102 of partially drawn with some capped honey, 3 frames of foundation and a 1-frame feeder. Hives were  
103 placed on stainless steel electronic scales (Tekfa model B-2418 and Avery Weigh-Tronix model  
104 BSAO1824-200) (max. capacity: 100 kg, precision:  $\pm 20$ g; operating temperature:  $-30^{\circ}\text{C}$  to  $70^{\circ}\text{C}$ ) and  
105 linked to 16-bit dataloggers (Hobo UX120-006M External Channel datalogger, Onset Computer  
106 Corporation, Bourne, MA, USA) with weight recorded every 5 minutes. The scales were powered by  
107 deep-cycle batteries connected to solar panels. The system had an overall precision of approximately  
108  $\pm 20$  g. Hives were arranged in a circular pattern around a central box that contained the batteries and  
109 electronic gear. Hives within such a group were 0.5- 1 m apart and groups were  $>3$  m apart.

110 Colonies were all fed 2 kg sugar syrup (1:1 w:w) and 250 g pollen patty, made at a ratio of 1: 1: 1  
111 corbicular pollen (Great Lakes Bee Co.): granulated sugar: drivert sugar (Domino Foods). The apiary was  
112 surrounded by native, unmanaged plants, including mesquite (*Prosopis* spp.), creosote (*Larrea* spp.),  
113 cactus (mainly *Opuntia* spp.) and wildflowers. No commercial agriculture exists within a 10 km of the  
114 apiary. On 10 July a temperature sensor (iButton ThermoChron, precision  $\pm 0.06^{\circ}\text{C}$ ) enclosed in plastic  
115 tissue embedding cassettes (Thermo Fisher Scientific, Waltham, MA) was stapled to the center of the  
116 top bar on the 5<sup>th</sup> frame in the bottom box of each hive and set to record every 15 min. The same day,  
117 pieces of slick paperboard coated with petroleum jelly and covered with mesh screens were inserted  
118 onto the hive floor to monitor *Varroa* mite fall within the hive. The boards were removed 2 days later,  
119 and the number of mites counted on each board. Infestation levels of *Varroa* were again monitored  
120 during and post treatment. Colonies were treated with amitraz (Apivar) on 19 October.

121 Hives were assessed on 12 July, and approximately every 5-6 weeks thereafter until November,  
122 using a published protocol (see [22, 29, 30]). Briefly, the hive was opened after the application of smoke,  
123 and each frame was lifted out sequentially, gently shaken to dislodge adult bees, photographed using a  
124 16.3 megapixel digital camera (Canon Rebel SL1, Canon USA, Inc., Melville, NY), weighed on a portable  
125 scale (model EC15, Ohaus), and replaced in the hive. Frame photographs were analyzed later in the

126 laboratory (see below). During this first assessment (but not subsequent assessments), all hive  
127 components (i.e. lid, inner cover, box, bottom board, frames, entrance reducer, internal feeder) were  
128 also shaken free of bees and weighed to yield an initial mass of all hive components. At the initial  
129 inspection, 3-5 g of wax were collected from each hive into 50 ml centrifuge tubes and stored at -80°C;  
130 samples collected in September, prior to treatment, were pooled and subjected to a full panel analysis  
131 for residues of pesticides and fungicides, from all major classes, by the Laboratory Approval and Testing  
132 Division, Agricultural Marketing Service, USDA. Samples from later assessments were pooled within  
133 treatment group and subjected only to neonicotinoid residue analysis. Hives were assessed again 13  
134 February 2020 and finally on 29 March.

135 Newly-emerged bees (NEBs) were sampled by pressing an 8 cm x 8 cm x 2 cm cage of wire mesh into  
136 a section of capped brood, then returning the following day to collect NEBs that had emerged within the  
137 cage over the previous 24 h. The NEBs were then placed in a 50 mL centrifuge tube, frozen on dry ice,  
138 and stored at -80°C. At the laboratory, 5 bees per hive per assessment date were placed in Eppendorf  
139 tubes, weighed, dried for 72 h at 60°C, then re-weighed to determine average wet and dry weight per  
140 bee. NEBs were collected on 12 July and 24 August 2017 (brood levels were too low in October 2017 for  
141 sampling).

142 After the first assessment, hives were ranked in terms of adult bee mass and then randomly  
143 assigned to treatment group, ensuring that the average bee masses per group were approximately equal  
144 and after eliminating assignments with excessive clumping by treatment. Just prior to treatment all  
145 broodless frames containing honey and/or pollen were replaced with frames of empty drawn comb  
146 collected earlier from the same apiary. Colonies were then fed 3 kg syrup twice per week from 14 July to  
147 21 August, with clothianidin concentrations depending on their treatment group. Hives were assessed  
148 approximately every 5-6 weeks thereafter until November, and again in February and March. Hives were

149 inspected from lowest to highest concentration treatments, and all equipment cleaned or changed  
150 between treatment groups.

151 **SRER 2018-19 experiment.** The 2017-18 experiment was repeated. On 11 April, 2018, 24 bee  
152 colonies were established from packages from the same supplier again into Langstroth boxes at the  
153 same location, with approximately the same initial assortment of drawn comb and food resources. Hives  
154 were again placed on the hive scales, powered and monitored in the same manner. Colonies were fed in  
155 the same manner as before. Temperature sensors were installed on 28 June. Varroa mite fall onto  
156 adhesive boards was monitored 6-9 July. Hives were assessed on 5 July in the same manner as before,  
157 and wax, honey, and NEBs were sampled. NEBS were sampled on 6 July, 23 August and 4 October, 2018.  
158 CO<sub>2</sub> probes (Vaisala), calibrated for 0-20% concentrations, were installed in five hives in each treatment  
159 group and set to record CO<sub>2</sub> concentration every 5 minutes.

160 After the first assessment, hives were ranked in terms of adult bee mass and assigned to treatment  
161 groups in the same manner as the previous year. Again, just prior to treatment all broodless frames  
162 containing honey and/or pollen were replaced with frames of empty drawn comb collected earlier from  
163 the same apiary. Colonies were fed 3 kg sugar syrup twice per week from 12 July to 20 August with the  
164 same pesticide concentrations as the previous year.

165 Varroa infestation levels were again monitored at the end of August and again at the beginning of  
166 November. Colonies were treated with amitraz (Apivar®) on 19 October. Hives were assessed  
167 approximately every 5-6 weeks thereafter until November, and then in February, at which point the  
168 experiment was ended. Hives were inspected from lowest to highest concentration treatments, and all  
169 equipment cleaned or changed between treatment groups.

170 **POPL 2018-19 experiment.** Full bee colonies, each comprised of two “deep” boxes as described  
171 above, were obtained from a local bee supplier (Gunter Apiaries, Lumberton MS) as nucleus colonies the  
172 previous year. Colonies were placed on hive scales (Tekfa model B-2418) on 16 May 2018. Colonies were



173 assessed, using the methods described above, on 11 July 2018 and temperature sensors (iButtons) were  
174 installed on 12 July 2018. Frames of honey were removed on 18 July and colonies were randomly placed  
175 in treatment groups. Treatment feeding commenced 24 July, lasting 31 August, using the same  
176 concentrations and amounts as described above. Colonies were not fed pollen patty because sufficient  
177 pollen was available. Colonies were assessed again 20 September 2018 and finally on 27 March 2019.  
178 Samples of 300 bees were collected on 7 May 2018, washed in 70% ethanol and the Varroa mites  
179 counted. Colonies were treated for Varroa (Checkmite, Mann Lake Ltd) on 28 June 2018. The apiary site  
180 was assessed using the National Agricultural Statistical Service (NASS) Cropscape web site  
181 (<https://nassgeodata.gmu.edu/CropScape>) to obtain acreage estimates for all land use categories  
182 within an approximately 1.8 km radius of the apiary.

183 **Data analysis.** The area of sealed brood per frame was estimated from the photographs using  
184 ImageJ version 1.47 software (W. Rasband, National Institutes of Health, USA) or CombCount [31]; this  
185 method has been described in other publications (e.g. [29, 30, 32]).

186 The total weight of the adult bee population was calculated by subtracting the combined weights of  
187 hive components (i.e. lid, inner cover, box, bottom board, frames, entrance reducer, internal feeder)  
188 obtained at the start of the experiment (model EC15, Ohaus) from the total hive weight recorded the  
189 midnight prior to the inspection.

190 Honey bee colony survivorship was analyzed using Proc LifeReg (SAS Inc. 2002). Survivorship curves  
191 were generated for each treatment group within each experiment. Treatments compared using ANOVA  
192 ( $\alpha=0.05$ ) (Proc Glimmix, SAS Inc. 2002) with respect to three parameters: 1) the 30<sup>th</sup> percentile; 2) the  
193 50<sup>th</sup> percentile; and 3) a shape variable calculated by subtracting the 40<sup>th</sup> from the 30<sup>th</sup> percentile.

194 Daily hive weight change was calculated as the weight change from midnight of a given day to 23 h  
195 55 min later. Continuous temperature data were divided into daily average data and within-day  
196 detrended data. Detrended data were obtained as the difference between the 25 hour running average

197 and the raw data. Sine curves were fit to 3-day subsamples of the detrended data, taken sequentially by  
198 day (see [32]). Curve amplitudes, representing estimates of daily variability, were reduced to a data  
199 point every 3 days, to ensure no overlap between data subsamples, for repeated measures MANOVA  
200 analyses. CO<sub>2</sub> concentration data were treated in the same fashion.

201 Adult bees, brood surface area, daily hive weight change, internal hive temperature average and  
202 variability (i.e. amplitudes of fit sine curves) and CO<sub>2</sub> concentration average and variability were used as  
203 response variables in repeated-measures MANOVA (Proc Glimmix, SAS Inc. 2002) with Treatment,  
204 Sampling date, Experiment and Day, and all 2-way interactions, as fixed effects and with pre-treatment  
205 values as a covariate to control for pre-existing differences. Analyses of hive weight and temperature  
206 were limited to approximately 3 months after the end of treatment to focus on the active season, and  
207 initially consisted of omnibus tests that included all three field experiments followed by analyses within  
208 each experiment. The reason for this is that effects that are significant in one trial might not be so in  
209 another, or might be significant but in a contrary fashion. CO<sub>2</sub> concentration data were only collected in  
210 the SRER 2018-19 experiment.

211 NEB data were analyzed with Treatment, Sampling date and their interaction, with the July values as  
212 a covariate. Varroa fall were analyzed within each SRER experiment, with the pre-treatment values used  
213 as covariates where applicable. Varroa alcohol wash data for POPL 2018-19 were analyzed separately.

214 Ambient temperature, rainfall and ambient CO<sub>2</sub> data were obtained for Arizona: AmeriFlux US-SRM  
215 Santa Rita Mesquite, doi:10.17190/AMF/1246104; and temperature and rainfall data for Mississippi:  
216 National Environmental Satellite, Data, and Information Service, National Oceanic and Atmospheric  
217 Administration, Poplarville Experimental Station, MS US USC00227128.

218

## 219 **Results**

220 Hive survivorship. No significant differences were observed among treatment groups with respect to  
221 hive survivorship for any of the experiments ( $p=0.40$  for the 30<sup>th</sup> percentile,  $p=0.34$  for the 50<sup>th</sup>  
222 percentile, and  $p=0.32$  for the difference between the 30<sup>th</sup> and 40<sup>th</sup> percentiles) (Figure 1). Four of 6  
223 colonies died in the clothianidin 20 ppb treatment group during the course of the SRER 17-18  
224 experiment, compared to 2 in the Control treatment group and 1 in the clothianidin 5 ppb treatment  
225 group, while in SRER 2018-19 both the clothianidin 20 ppb and Control groups lost 2 colonies while the  
226 clothianidin 5 ppb group lost 3. POPL 2018-19, the treatment groups with clothianidin both lost 2 of 5  
227 colonies while the Control group lost 3.

228  
229 **Fig. 1.** Honey bee colony survivorship for each of 3 treatment groups. A) SRER 2017-18; B) SRER 2018-19;  
230 C) POPL 2018-19.

231  
232 Adult bees. Hive evaluations were conducted on different schedules between the two experimental  
233 sites (SRER and Poplarville), so analyses for the two sites were conducted separately. Treatment effects  
234 were significant at the SRER site ( $p=0.0456$ ) (S1 and S2 Tables); pairwise contrasts did not reveal any  
235 significant differences at the  $p=0.05$  level among treatment groups ( $p=0.0571$  for the contrast between  
236 clothianidin 20 ppb and control groups) (Figure 2). Treatment effects were not significant in the  
237 Poplarville experiment ( $p=0.62$ ).

238  
239 **Fig. 2.** Average adult bee mass (kg) per colony for each of 3 treatment groups: Clothianidin 20 ppb  
240 (blue), clothianidin 5 ppb (orange), control (gray). A) SRER 2017-18; B) SRER 2018-19; C) POPL 2018-  
241 19. Boxes are defined as  $1.58 * IQR / n^{0.5}$ , where IQR is the inter-quartile range and  $n$  is the number  
242 of data points.

243

244 Brood. Considering the brood surface area by site, as described above, treatment had no significant  
245 effect at either the SRER site ( $p=0.55$ ) or the Poplarville site ( $p=0.38$ ) (Figure 3, S3 Table).

246

247 **Fig. 3.** Average brood surface area ( $\text{cm}^2$ ) per colony for each of 3 treatment groups: Clothianidin 20 ppb  
248 (blue), clothianidin 5 ppb (orange), control (gray). A) SRER 2017-18; B) SRER 2018-19; C) POPL 2018-  
249 19. Boxes are defined as  $1.58 * \text{IQR} / n^{0.5}$ , where IQR is the inter-quartile range and  $n$  is the number  
250 of data points.

251

252 Newly Emerged Bees. Data for the SRER 2017-18 experiment were only available for July (pre-  
253 treatment) and August (immediately post-treatment) and treatment was not significant ( $p=0.19$ ) (S4-S7  
254 Tables). With respect to the 2018-19 experiment, treatment had a significant effect ( $p=0.0046$ ) on NEB  
255 dry weight for the August and October samples collected in 2018 (Figure 4). Neither sampling date nor  
256 the interaction term were significant, indicating the relationships remained largely the same between  
257 the two sampling dates. Pairwise contrasts showed that average NEB dry weight from the clothianidin 5  
258 ppb treatment group were significantly smaller than those from the control group ( $p=0.0054$ ) and the  
259 clothianidin 20 ppb group ( $p=0.0310$ ). The control and clothianidin 20 ppb groups were not significantly  
260 different.

261 Considering the SRER 2017-18 and 2018-19 experiments together for August (the only sampling date  
262 that both experiments had in common), and again using pre-treatment values as a covariate, treatment  
263 was significant ( $p=0.0413$ ), while year and the treatment x year interaction were not. Pairwise contrasts  
264 showed that the control NEB dry weights were significantly larger than those for clothianidin 5 ppb  
265 ( $p=0.0440$ ).

266

267 **Fig. 4.** Average Newly Emerged Bee (NEB) dry weights for each of 3 treatment groups: Clothianidin 20  
268 ppb (blue), clothianidin 5 ppb (orange), control (gray). A) SRER 2017-18 (2 sampling dates); B) 2018-  
269 19 experiment (3 sampling dates). Boxes are defined as  $1.58 * IQR / n^{0.5}$ , where IQR is the inter-  
270 quartile range and n is the number of data points.

271

272 Daily hive weight change. Because daily hive weight change was monitored in the same manner  
273 among all sites and years, all experiments could be included in the same analyses. Considering all  
274 experiments together during the first 60 days after the end of the treatment period, no significant  
275 treatment effects were observed ( $p=0.57$ ) (Figure 5) (S8-S13 Tables). However, experiments were  
276 different from each other ( $p<0.0001$ ) and hives in the SRER 2017-18 experiment had significantly lower  
277 daily weight gain than hives in either the SRER 2018-19 or POPL 2018-19 experiments ( $p<0.0001$  and  
278  $p=0.0205$ , respectively). When experiments were considered separately, treatment effects were  
279 significant for the SRER 2018-19 study ( $p=0.0256$ ) and the clothianidin 5 ppb treatment group gained  
280 more weight per day on average than the clothianidin 20 ppb treatment group ( $p=0.0254$ ). Treatment  
281 effects were not significant for the SRER 2017-18 ( $p=0.46$ ) or the Poplarville 2018-19 study ( $p=0.11$ ).

282

283 **Fig. 5.** Average colony weight (kg) per hour for each of 3 treatment groups: Clothianidin 20 ppb (blue),  
284 clothianidin 5 ppb (orange), control (gray). A) SRER 2017-18; B) SRER 2018-19; C) POPL 2018-19.

285

286 Hive temperature. Internal hive temperature and temperature amplitude from the end of treatment  
287 in August until the end of the following December, to capture the end of the annual active season, were  
288 used as response variables. No significant differences in average internal hive temperature (Figure 6) or  
289 temperature variability (Figure 7) were observed with respect to treatment, either in an omnibus  
290 analysis including all three field trials or in analyses considering each experiment separately (S14-S23

291 Tables). Average temperature was significantly different among experiments ( $p=0.0367$ ), and in pairwise  
292 contrasts only temperatures between SRER 2017-18 and SRER 2018-19 experiments were significantly  
293 different ( $p=0.0362$ ). Temperature variability was likewise different among experiments ( $p<0.0001$ ) and  
294 pairwise contrasts indicated significant differences in all pairwise contrasts of experiments (all  $p < or$   
295  $=0.0001$ ).

296

297 **Fig. 6.** 25 hour running average internal hive temperature ( $^{\circ}\text{C}$ ) per hour for each of 3 treatment groups  
298 compared to ambient temperatures. A) SRER 2017-18; B) SRER 2018-19; C) POPL 2018-19.

299

300 **Fig. 7.** Average daily amplitudes of sine curves fit to within-day temperature changes per day (see text  
301 for details) for each of 3 treatment groups. A) SRER 2017-18; B) SRER 2018-19; C) POPL 2018-19.

302

303 CO<sub>2</sub> concentration. Treatment had a significant effect ( $p=0.0073$ ) on average CO<sub>2</sub> concentrations  
304 within the hive for at least the first two months after the end of the treatment period, from 31 August to  
305 31 October (Figure 8, S24 and S25 Tables). Pairwise contrasts indicated that hives in the clothianidin 20  
306 ppb treatment group had significantly higher CO<sub>2</sub> concentration than either the clothianidin 5 ppb group  
307 ( $p=0.0064$ ) and the control group ( $p=0.0405$ ). Treatment did not have a significant effect on CO<sub>2</sub>  
308 concentration variability (amplitude) ( $p=0.13$ ). Daily amplitudes within the hives ranged across  
309 treatment groups from 1933 to 2441 ppm, whereas amplitudes of ambient CO<sub>2</sub> averaged 49 across the  
310 same time period.

311

312 **Fig. 8.** Running average CO<sub>2</sub> concentrations, and daily amplitudes of sine curves fit to within-day CO<sub>2</sub>  
313 concentration changes per day (see text for details), for each of 3 treatment groups for the SRER  
314 2018-19 experiment. A) 25 hour running average; B) daily amplitudes.

315

316 Varroa density. Varroa mite fall per hive was not affected by treatment group either in the SRER  
317 2017-18 ( $p=0.48$ ) or SRER 2018-19 ( $p=0.82$ ) experiments (Table 2, S26 and S27 Tables).

318

319 **Table 2.** Mite infestations per experiment. Mite levels in the two SRER experiments were calculated as  
320 the number of mites fallen per colony per day; mite levels in the POPL 2018-19 experiment were  
321 calculated as number of mites per 100 bees from samples of 300 bees.

322

| Treatment           | SRER 2017-18 |           | SRER 2018-19 |          |           | POPL 2018-19 |
|---------------------|--------------|-----------|--------------|----------|-----------|--------------|
|                     | July         | October   | July         | October  | November  | May          |
| Clothianidin 20 ppb | 2.7±0.9      | 7.8±4.2   | 3.9±1.3      | 18.7±7.1 | 17.5±6.7  | 8.9±8.1      |
| Clothianidin 5 ppb  | 2.0±0.8      | 19.8±11.6 | 3.4±1.7      | 16.9±6.7 | 37.1±12.9 | 3.7±1.1      |
| Control             | 1.5±0.7      | 15.3±10.0 | 6.6±2.3      | 14.3±4.1 | 38.0±18.7 | 5.6±1.9      |

323

324 Landscape analysis. Analysis of the Poplarville landscape using CropScape yielded the following  
325 usage patterns within foraging distance of the Poplarville apiary (Table 3).

326

327 **Table 3.** Estimated surface area and percentage area for a circle with a radius of approximately 1.8 km (=   
328 approximately 1018 ha) of land around the MS apiary in this study according to the Cropscape web site  
329 (see text for details).

330

| Category | Area (ha) | Percentage |
|----------|-----------|------------|
| Corn     | 0.63      | 0.06       |
| Cotton   | 0.51      | 0.05       |

|                            |        |       |
|----------------------------|--------|-------|
| Soybeans                   | 1.50   | 0.14  |
| Other Hay/Non Alfalfa      | 0.35   | 0.03  |
| Sweet Potatoes             | 0.08   | 0.01  |
| Sod/Grass Seed             | 0.08   | 0.01  |
| Open Water                 | 25.91  | 2.40  |
| Developed/Open Space       | 138.50 | 12.85 |
| Developed/Low Intensity    | 64.25  | 5.96  |
| Developed/Medium Intensity | 49.13  | 4.56  |
| Developed/High Intensity   | 13.31  | 1.23  |
| Barren                     | 2.28   | 0.21  |
| Deciduous Forest           | 2.09   | 0.19  |
| Evergreen Forest           | 146.93 | 13.63 |
| Mixed Forest               | 16.38  | 1.52  |
| Shrubland                  | 341.65 | 31.69 |
| Grass/Pasture              | 129.41 | 12.00 |
| Woody Wetlands             | 144.02 | 13.36 |
| Herbaceous Wetlands        | 1.06   | 0.10  |

331

332 Pesticide residues. Residues in honey other than clothianidin were limited to thymol and trace amounts

333 of 2,4-dimethylphenyl formamide (2,4-DMPF) in one sample (Table 4). Wax samples had many

334 compounds but the residue concentrations were very low compared to acute contact LD<sub>50</sub> (Table 5).

335

336 **Table 4.** Concentrations of clothianidin and thymol in honey and syrup samples across treatment groups

337 for the two experiments in Arizona. Values are parts per billion.



338

| Year | Treatment group | Matrix | Thymol | Clothianidin |           |           |           |
|------|-----------------|--------|--------|--------------|-----------|-----------|-----------|
|      |                 |        |        | 7/10/2017    | 8/24/2017 | 11/9/2017 | 2/21/2018 |
| 2017 | Cloth_20        | Honey  | 15     | 0            | 153       | 107       | 103       |
|      | Cloth_05        | Honey  | 23     | 0            | 42        | 34        | 18        |
|      | Control         | Honey  | 89*    | 0            | 0         | 0         | 0         |
|      | Cloth_20        | Syrup  |        | 46           |           |           |           |
|      | Cloth_5         | Syrup  |        | 12           |           |           |           |
|      |                 |        |        | 7/9/2018     | 8/22/2018 |           |           |
| 2018 | Cloth_20        | Honey  | 55     | 0            | 22        |           |           |
|      | Cloth_05        | Honey  | -      | 0            | trace     |           |           |
|      | Control         | Honey  | -      | 0            | 0         |           |           |
|      | Cloth_20        | Syrup  |        | 33           |           |           |           |
|      | Cloth_5         | Syrup  |        | 12           |           |           |           |

339 \*Trace amounts of 2,4-DMPF were also detected.

340

341 **Table 5.** Pesticide concentrations in wax samples collected pre-treatment in the 2017-18 experiment in  
 342 Arizona. Values are parts per billion. "LOD" means Limit of Detection; "DMPF" is dimethylphenyl  
 343 formamide. Data on acute contact LD<sub>50</sub> were obtained from the Pesticide Properties Database  
 344 (<https://sitem.herts.ac.uk/aeru/ppdb/en/atoz.htm>) and converted from µg per bee to ppb assuming an  
 345 average bee mass of 0.1g.

346

| Compound | LOD | Contact | 2017-18 Treatment group | 2018-19 |
|----------|-----|---------|-------------------------|---------|
|----------|-----|---------|-------------------------|---------|

|                    |     | LD <sub>50</sub> | Cloth_20 | Cloth_5 | Control | Composite |
|--------------------|-----|------------------|----------|---------|---------|-----------|
| 2,4-DMPF           | 1.5 | 7.50E+05         | 7        | 14      | 32      | 56        |
| Boscalid           | 5   | >2.00E+06        | 5        | -       | -       | -         |
| Carbendazim        | 2   | >5.00E+05        | 24       | 27      | 37      | trace     |
| Chlorthal-dimethyl | 2   | >1.00E+06        | -        | trace   | -       | -         |
| Coumaphos oxon     | 1   | 5.93E+04         | 1        | 1       | 1       | trace     |
| Cyprodinil         | 2   | >7.84E+06        | -        | trace   | -       | -         |
| Diuron             | 1   | >1.02E+06        | 3        | 1       | 2       | trace     |
| Fenamidone         | 1   | >2.57E+05        | trace    | -       | -       | -         |
| Fenazaquin         | 1   | 1.21E+04         | -        | 2       | 1       | -         |
| Fenpyroximate      | 3   | 1.58E+05         | 5        | -       | 3       | trace     |
| Flumeturon         | 1   | >1.00E+06        | -        | -       | -       | trace     |
| Fluvalinate        | 25  | 4.32E+04         | trace    | trace   | trace   | trace     |
| Hexythiazox        | 2   | >2.00E+06        | trace    | trace   | trace   | trace     |
| Pendimethalin      | 50  | 1.00E+06         | -        | -       | trace   | -         |
| Piperonyl butoxide | 6   | NA               | 36       | 59      | trace   | trace     |
| Propargite         | 2   | 4.79E+05         | 32       | 19      | 29      | 7         |
| Thymol             | 2   | NA               | 799      | 991     | 2190    | 1470      |
| Trifluralin        | 10  | >1.00E+06        | -        | -       | -       | trace     |

347

348 Rainfall. Monthly precipitation during each of the trials is provided (Figure 9). Total precipitation differed  
349 greatly between the Arizona site and the Mississippi site, as well as between years at the Arizona site.  
350 The Mississippi site received 1395 mm during the experimental period whereas the Arizona site received  
351 an average of 413 mm. Precipitation was clearly more constant over the year in Mississippi than in

352 Arizona, which has strong seasonality. At the Arizona site, 286 mm of precipitation fell during the 2017-  
353 18 experiment while 540 mm fell the following year, an increase of 89%.

354

355 **Fig. 9.** Monthly rainfall during each field experiment. SRER = Santa Rita Experimental Range in Arizona;  
356 POPL = Poplarville, MS.

357

358

## 359 Discussion

360 The principle objective of this work was to determine whether the exposure of honey bee colonies  
361 to low, field-realistic concentrations of clothianidin would have measure effects on colony growth,  
362 foraging behavior, thermoregulation and CO<sub>2</sub> management. Effects have been observed with another  
363 neonicotinoid, imidacloprid, at similar exposure rates, in other multi-site experiments [20, 22]. In those  
364 studies, honey bee colonies fed 100 ppb imidacloprid in sugar syrup in Arizona, similar to the protocol  
365 used here, had lower adult bee populations, brood surface areas and higher within-day temperature  
366 variability, compared to colonies in one or more of the other treatment groups, and consumption rates  
367 of those colonies were also lower compared to other colonies [22]. In addition, a treatment of 5 ppb  
368 imidacloprid affected colonies both at the Arizona site, which was low in alternative forage, as well as at  
369 the Mississippi site, rich in alternative forage for much of the year.

370 In this study discrete (adult bee mass, brood surface area and NEB weights) and continuous (hive  
371 weight, internal temperature and CO<sub>2</sub> concentration) data were collected. Few effects attributable to  
372 treatment were observed with respect to continuous data. Variance among treatment groups in terms  
373 of hive weight and internal temperature data was mostly explained by the “Experiment” factor, which  
374 was a function of time (2017-18 or 2018-19) and place (Arizona or Mississippi). Significant treatment

375 effects were observed only with respect to adult bee mass and the dry weight of newly-emerged bees  
376 when two or more experiments were included. These differences correspond to a certain degree with  
377 results obtained from other research groups working with the exposure of honey bee colonies to  
378 sublethal concentrations of clothianidin [23-27]. The omnibus test for treatment was significant with  
379 respect to adult bee mass in the Arizona experiments, but no pairwise comparisons were significant at  
380 the  $\alpha=0.05$  level. That NEBs in colonies fed clothianidin 5 ppb were significantly smaller than control  
381 NEBs is somewhat unexpected, as it seems to suggest that there were effects at the lowest clothianidin  
382 concentration that were not present at the higher concentration. The same effect has been observed at  
383 about the same concentrations in another study involving foragers exposed to clothianidin as larvae [3].  
384 Such effects may have been due to hormesis, defined as a change in the shape of the dose-response  
385 curve at low, sublethal concentrations of toxic compounds [33]; effects observed at lower  
386 concentrations may be different, or even contrary, to those observed at higher concentrations.

387 The two Arizona experiments were conducted at the same location, so the kinds of forage would  
388 have been the same between those two experiments. However, rainfall was very different between the  
389 two years, indicating large differences in the quantity of forage available. The poorer forage  
390 opportunities in the 2017-18 season may explain the rapid weight loss in colonies post treatment  
391 compared to the following year, and the overall poorer thermoregulation (lower average temperature  
392 and greater within-day variability) for colonies from September to December compared to the following  
393 year. Similar results were obtained for behavior and thermoregulation of bee colonies given low  
394 concentrations of imidacloprid in parallel studies conducted in Arizona and Sydney, Australia [20]. In  
395 that study, bee colonies in Sydney, which has considerably higher rainfall than southern Arizona,  
396 showed no effect of imidacloprid exposure while those in Arizona did. Additional evidence for reduced  
397 alternative forage is provided by the pesticide residue analyses. As with imidacloprid [28], clothianidin  
398 was found stable in honey for several months after the end of syrup application. However, while the

399 residues in the original syrup were similar between the two years, the residues from the stored honey  
400 were much higher in 2017-18 than in the following year, suggesting less dilution from alternative nectar  
401 sources.

402 Colonies in Mississippi had a strong nectar flow at the beginning of October, as shown by the weight  
403 gain among all colonies, and overall better thermoregulation. This may have been due to the more  
404 abundant forage in the humid, low-altitude site in Mississippi. Thus, the negative impact of pesticide  
405 exposure may have been mitigated by the improved forage in the 2018-19 season compared to the  
406 2017-18 season, and by the overall better forage in Mississippi compared to Arizona.

407 While continuous hive weight and internal temperature data were not significantly different among  
408 treatment groups, continuous CO<sub>2</sub> concentration data did reveal significant treatment effects in the  
409 single season it was deployed. CO<sub>2</sub> concentration is a function of CO<sub>2</sub> production and air movement, so  
410 one or both of those factors was apparently affected. Like temperature, CO<sub>2</sub> concentration in bee hives  
411 also are carefully controlled. When [CO<sub>2</sub>], [O<sub>2</sub>] and [N<sub>2</sub>] were manipulated within the hive, only [CO<sub>2</sub>]  
412 influenced the fanning behavior of colony members [34]. By controlling CO<sub>2</sub> concentration in bee hives,  
413 bees actively maintain low (15%) [O<sub>2</sub>], causing a reversible hypoxia and reduced metabolic rate among  
414 the bees that, researchers have hypothesized, allows them to conserve water and energy, as well as  
415 increase activity on short notice [35]. Daily patterns in CO<sub>2</sub> concentration have been observed in bee  
416 hives [36], including peaks of air movement about every 22 seconds [37].

417 CO<sub>2</sub> concentration is fundamentally different from measures such as temperature and humidity,  
418 which also have ambient (external) counterparts, because ambient CO<sub>2</sub> concentration is a) very low (on  
419 average 409 ppm) compared to internal hive concentrations (>3700 ppm across all treatment groups);  
420 and b) varies little (on average about 49 ppm) with respect to time of day compared to the interior of a  
421 bee hive (on average >1900 ppm and often >5000 ppm). Ambient temperature and humidity can vary a  
422 great deal during the day, and ambient conditions can provide at times higher values than those

423 observed in the hive. That is never the case with the respect to CO<sub>2</sub> concentration because internal  
424 concentrations can never be lower than ambient concentrations. This significant treatment effect  
425 suggests further work in understanding the effects of low pesticide concentrations on individual and  
426 particularly colony-level behavior. Managing CO<sub>2</sub> concentration is a vital colony function, and how  
427 colonies circulate CO<sub>2</sub> in the hive likely provides information on colony health.

428 The importance of landscape in determining colony growth and activity has been observed in  
429 several studies. Bee colonies kept in agricultural landscapes were found to have higher growth rates,  
430 better thermoregulation, and lower pathogen loads than colonies kept in non-agricultural landscapes  
431 [38, 39]. Another study involving commercial colonies in a different set of environments in southern  
432 California confirmed those results, and reported better thermoregulation and stronger colonies, in  
433 apiaries located in heavy commercial agriculture (Imperial Valley, CA) compared to colonies kept in  
434 other landscapes with lower agrochemical exposure [40]. However, in a third set of landscapes, again  
435 with commercial colonies, honey bee colonies exposed to commercial agriculture were found to have  
436 higher levels of detoxification enzymes and poorer thermoregulation compared to colonies kept on  
437 Conservation Reserve Program land [41, 42]. Whether these conflicting results are a result of location-  
438 specific factors such as nutritional value of the forage, or reflect unknown factors, remains to be seen. It  
439 is hoped that gathering more different kinds of data, on the individual level but particularly on the  
440 colony level, such as CO<sub>2</sub> concentration, might provide further clues in understanding the relationships  
441 among bees, landscapes and stressors.

442

443

## 444 **Acknowledgements**

445 The authors would like to warmly thank M. Heitlinger at the Santa Rita Experimental Range  
446 and M. McClaran at the University of Arizona for providing field sites for the work, and R. Scott for  
447 access to weather data. In addition, the authors would like to thank M. Alburaki, T. Colin and V.  
448 Ricigliano for their helpful suggestions to the manuscript.

449

450

451 **S1 File.** Experimental data (XLSX).

452

453 **S1 Table.** MANOVA results for the effects of syrup treatment, i.e. clothianidin 20 ppb, clothianidin 5 ppb,  
454 and control (blank) across 2 experiments, i.e. Arizona 2017-18 and Arizona 2018-19, and 4 sampling  
455 occasions on average adult bee mass (kg) per colony. Hive number was a random factor and pre-  
456 treatment adult bee mass was used as a covariate to control for pre-existing differences among  
457 colonies.

458

459 **S2 Table.** Post hoc contrasts among treatment groups for S1 Table above.

460

461 **S3 Table.** MANOVA results for the effects of syrup treatment, i.e. clothianidin 20 ppb, clothianidin 5 ppb,  
462 and control (blank) across 3 experiments, i.e. Arizona 2017-18, Arizona 2018-19, and Mississippi 2018-19  
463 and 4 sampling occasions on capped brood surface area (cm<sup>2</sup>) per colony. Hive number was a random  
464 factor and pre-treatment adult bee mass was used as a covariate to control for pre-existing differences  
465 among colonies.

466

467 **S4 Table.** MANOVA results for the effects of syrup treatment, i.e. clothianidin 20 ppb, clothianidin 5 ppb,  
468 and control (blank) on Newly Emerged Bee (NEB) dry weights (g) post treatment across 2 experiments,  
469 i.e. Arizona 2017-18 and Arizona 2018-19. Ten bees were collected per colony per sampling occasion  
470 and the average value per colony was used as the response variable. Hive number was a random factor  
471 and pre-treatment NEB dry weight was used as a covariate to control for pre-existing differences among  
472 colonies.

473

474 **S5 Table.** Post hoc contrasts among treatment groups for S4 Table above.



475

476 **S6 Table.** MANOVA results for the effects of syrup treatment, i.e. clothianidin 20 ppb, clothianidin 5 ppb,  
477 and control (blank) on Newly Emerged Bee dry weights (g) across 2 post-treatment sampling occasions  
478 for the Arizona 2018-19 experiment. Ten bees were collected per colony per sampling occasion and the  
479 average value per colony was used as the response variable. Hive number was a random factor and pre-  
480 treatment NEB dry weight was used as a covariate to control for pre-existing differences among  
481 colonies.

482

483 **S7 Table.** Post hoc contrasts among treatment groups for S6 Table above.

484

485 **S8 Table.** MANOVA results for the effects of syrup treatment, i.e. clothianidin 20 ppb, clothianidin 5 ppb,  
486 and control (blank) across 3 experiments, i.e. Arizona 2017-18, Arizona 2018-19, and Mississippi 2018-19  
487 on hive weight change (g) per colony for days 33-78 after the start of the experiment. Hive number was  
488 a random factor and pre-treatment adult bee mass was used as a covariate to control for pre-existing  
489 differences.

490

491 **S9 Table.** Post hoc contrasts among treatment groups for S8 Table above.

492

493 **S10 Table.** MANOVA results for the effects of syrup treatment, i.e. clothianidin 20 ppb, clothianidin 5  
494 ppb, and control (blank) for the experiment conducted in Arizona 2017-18 on hive weight change (g) per  
495 colony for days 33-78 after the start of the experiment. Hive number was a random factor and pre-  
496 treatment adult bee mass was used as a covariate to control for pre-existing differences.

497

498 **S11 Table.** MANOVA results for the effects of syrup treatment, i.e. clothianidin 20 ppb, clothianidin 5  
499 ppb, and control (blank) for the experiment conducted in Arizona 2018-19 on hive weight change (g) per  
500 colony for days 33-78 after the start of the experiment. Hive number was a random factor and pre-  
501 treatment adult bee mass was used as a covariate to control for pre-existing differences.

502

503 **S12 Table.** Post hoc contrasts among treatment groups for S11 Table above.

504

505 **S13 Table.** MANOVA results for the effects of syrup treatment, i.e. clothianidin 20 ppb, clothianidin 5  
506 ppb, and control (blank) for the experiment conducted in Mississippi 2018-19 on hive weight change (g)  
507 per colony for days 33-78 after the start of the experiment. Hive number was a random factor and pre-  
508 treatment adult bee mass was used as a covariate to control for pre-existing differences.

509

510 **S14 Table.** MANOVA results for the effects of syrup treatment, i.e. clothianidin 20 ppb, clothianidin 5  
511 ppb, and control (blank) across 3 experiments, i.e. Arizona 2017-18, Arizona 2018-19, and Mississippi  
512 2018-19, on hive internal temperature (°C) for 3 months (1 Sept. – 1 Dec.) after the end of the  
513 treatment. Hive number was a random factor and pre-treatment adult bee mass was used as a covariate  
514 to control for pre-existing differences.

515

516 **S15 Table.** Post hoc contrasts among treatment groups for S14 Table above.

517

518 **S16 Table.** MANOVA results for the effects of syrup treatment, i.e. clothianidin 20 ppb, clothianidin 5  
519 ppb, and control (blank) for the experiment conducted in Arizona 2017-18 on hive internal temperature  
520 (°C) for 3 months (1 Sept. – 1 Dec.) after the end of the treatment. Hive number was a random factor  
521 and pre-treatment adult bee mass was used as a covariate to control for pre-existing differences.

522

523 **S17 Table.** MANOVA results for the effects of syrup treatment, i.e. clothianidin 20 ppb, clothianidin 5  
524 ppb, and control (blank) for the experiment conducted in Arizona 2018-19 on hive internal temperature  
525 (°C) for 3 months (1 Sept. – 1 Dec.) after the end of the treatment. Hive number was a random factor  
526 and pre-treatment adult bee mass was used as a covariate to control for pre-existing differences.

527

528 **S18 Table.** MANOVA results for the effects of syrup treatment, i.e. clothianidin 20 ppb, clothianidin 5  
529 ppb, and control (blank) for the experiment conducted in Mississippi 2018-19 on hive internal  
530 temperature (°C) for 3 months (1 Sept. – 1 Dec.) after the end of the treatment. Hive number was a  
531 random factor and pre-treatment adult bee mass was used as a covariate to control for pre-existing  
532 differences.

533

534 **S19 Table.** MANOVA results for the effects of syrup treatment, i.e. clothianidin 20 ppb, clothianidin 5  
535 ppb, and control (blank) across 3 experiments, i.e. Arizona 2017-18, Arizona 2018-19, and Mississippi  
536 2018-19, on hive internal temperature amplitudes (°C) from the end of treatment to the end of the  
537 annual active season (25 Sept. – 31 Dec.). Hive number was a random factor and pre-treatment adult  
538 bee mass was used as a covariate to control for pre-existing differences.

539

540 **S20 Table.** Post hoc contrasts among treatment groups for S19 Table above.

541

542 **S21 Table.** MANOVA results for the effects of syrup treatment, i.e. clothianidin 20 ppb, clothianidin 5  
543 ppb, and control (blank) for the Arizona 2017-18 experiment on hive internal temperature amplitudes  
544 (°C) from the end of treatment to the end of the annual active season (25 Sept. – 31 Dec.). Hive number

545 was a random factor and pre-treatment adult bee mass was used as a covariate to control for pre-  
546 existing differences.

547

548 **S22 Table.** MANOVA results for the effects of syrup treatment, i.e. clothianidin 20 ppb, clothianidin 5  
549 ppb, and control (blank) for the Arizona 2018-19 experiment on hive internal temperature amplitudes  
550 (°C) from the end of treatment to the end of the annual active season (25 Sept. – 31 Dec.). Hive number  
551 was a random factor and pre-treatment adult bee mass was used as a covariate to control for pre-  
552 existing differences.

553

554 **S23 Table.** MANOVA results for the effects of syrup treatment, i.e. clothianidin 20 ppb, clothianidin 5  
555 ppb, and control (blank) for the Mississippi 2018-19 experiment on hive internal temperature  
556 amplitudes (°C) from the end of treatment to the end of the annual active season (25 Sept. – 31 Dec.).  
557 Hive number was a random factor and pre-treatment adult bee mass was used as a covariate to control  
558 for pre-existing differences.

559

560 **S24 Table.** MANOVA results for the effects of syrup treatment, i.e. clothianidin 20 ppb, clothianidin 5  
561 ppb, and control (blank) for the Arizona 2018-19 experiment on hive internal CO<sub>2</sub> concentration (ppm)  
562 from 1 Sept to 31 Oct. Hive number was a random factor and pre-treatment adult bee mass was used as  
563 a covariate to control for pre-existing differences.

564

565 **S25 Table.** Post hoc contrasts among treatment groups for S24 Table above.

566

567 **S26 Table.** MANOVA results for the effects of syrup treatment, i.e. clothianidin 20 ppb, clothianidin 5  
568 ppb, and control (blank) on Varroa mite fall post-treatment for the Arizona 2017-18 experiment. Hive

569 number was a random factor and pre-treatment Varroa mite fall was used as a covariate to control for  
570 pre-existing differences among colonies.

571

572 **S27 Table.** MANOVA results for the effects of syrup treatment, i.e. clothianidin 20 ppb, clothianidin 5  
573 ppb, and control (blank) on Varroa mite fall for two sampling occasions post-treatment for the Arizona  
574 2018-19 experiment. Hive number was a random factor and pre-treatment Varroa mite fall was used as  
575 a covariate to control for pre-existing differences among colonies.

576

## 577 **References**

- 578 1. Mitchell EAD, Mulhauser B, Mulo M, Mutabazi A, Glauser G, Aebi A (2017) A worldwide survey of  
579 neonicotinoids in honey. *Science* 358 (6359):109-111. doi:10.1126/science.aan3684.
- 580 2. Casida JE (2018) Neonicotinoids and other insect nicotinic receptor competitive modulators: Progress  
581 and prospects. *Annu Rev Entomol* 63:125-144. doi:10.1146/annurev-ento-020117-043042.
- 582 3. Morfin N, Goodwin PH, Correa-Benitez A, Guzman-Novoa E (2019) Sublethal exposure to clothianidin  
583 during the larval stage causes long-term impairment of hygienic and foraging behaviours of honey  
584 bees. *Apidologie* 50(5):595-605. doi:10.1007/s13592-019-00672-1.
- 585 4. Morfin N, Goodwin PH, Hunt GJ, Guzman-Novoa E (2019) Effects of sublethal doses of clothianidin  
586 and/or *V. destructor* on honey bee (*Apis mellifera*) self-grooming behavior and associated gene  
587 expression. *Sci Rep* 9(1) 5196. doi:10.1038/s41598-019-41365-0.
- 588 5. Morfin N, Goodwin PH, Guzman-Novoa E (2020) Interaction of field realistic doses of clothianidin and  
589 *Varroa destructor* parasitism on adult honey bee (*Apis mellifera* L.) health and neural gene  
590 expression, and antagonistic effects on differentially expressed genes *PLoS ONE* 15(2) e0229030.  
591 doi:10.1371/journal.pone.0229030.
- 592 6. Tison L, Rößner A, Gerschewski S, Menzel R (2019) The neonicotinoid clothianidin impairs memory  
593 processing in honey bees. *Ecotoxicol Environ Safety* 180:139-145.  
594 doi:10.1016/j.ecoenv.2019.05.007.
- 595 7. Abdelkader FB, Kairo G, Bonnet M, Barbouche N, Belzunces LP, Brunet JL (2019) Effects of clothianidin  
596 on antioxidant enzyme activities and malondialdehyde level in honey bee drone semen. *J Apicult Res*  
597 58(5):740-745. doi:10.1080/00218839.2019.1655182
- 598 8. Yao J, Zhu YC, Adamczyk J (2018) Responses of honey bees to lethal and sublethal doses of formulated  
599 clothianidin alone and mixtures. *J Econ Entomol* 111(4):1517-1525. doi:10.1093/jee/toy140.

- 600 9. Henry M, Béguin M, Requier F, Rollin O, Odoux J-F, Aupinel P, *et al.* (2012) A common pesticide  
601 decreases foraging success and survival in honey bees. *Science* 336:348-350.  
602 doi:10.1126/science.1215039.
- 603 10. Samson-Robert O, Labrie G, Chagnon M, Fournier V (2017) Planting of neonicotinoid-coated corn  
604 raises honey bee mortality and sets back colony development. *PeerJ* 8:3670. doi:10.7717/peerj.3670
- 605 11. Tsvetkov N, Samson-Robert O, Sood K, Patel HS, Malena DA, Gajiwala PH, *et al.* (2017) Chronic  
606 exposure to neonicotinoids reduces honey bee health near corn crops *Science* 356(6345):1395-  
607 1397. doi:10.1126/science.aam7470.
- 608 12. Zhu YC, Adamczyk J, Rinderer T, Yao J, Danka R, Luttrell R, *et al.* (2015) Spray toxicity and risk  
609 potential of 42 commonly used formulations of row crop pesticides to adult honey bees  
610 (Hymenoptera: Apidae). *J Econ Entomol* 108(6):2640-2647. doi:10.1093/jee/tov269.
- 611 13. El Hassani AK, Dacher M, Gary V, Lambin M, Gauthier M, Armengaud C (2008) Effects of sublethal  
612 doses of acetamiprid and thiamethoxam on the behavior of the honeybee (*Apis mellifera*). *Arch*  
613 *Environ Contam Toxicol* 54:653–661.
- 614 14. Tosi S, Nieh JC, Sgolastra F, Cabbri R, Medrzycki P (2017) Neonicotinoid pesticides and nutritional  
615 stress synergistically reduce survival in honey bees. *Proc Royal Soc B: Biological Sciences* 284:1869.  
616 doi:10.1098/rspb.2017.1711.
- 617 15. Coulon M, Schurr F, Martel A-C, Cougoule N, Bégaud A, Mangoni P, *et al.* (2019) Influence of chronic  
618 exposure to thiamethoxam and chronic bee paralysis virus on winter honey bees. *PLoS ONE*  
619 14(8):e0220703. doi:10.1371/journal.pone.0220703.
- 620 16. Dively GP, Embrey MS, Kamel A, Hawthorne DJ, Pettis JS (2015) Assessment of chronic sublethal  
621 effects of imidacloprid on honey bee colony health. *PLoS ONE* 10(3): e0118748.  
622 doi:10.1371/journal.pone.0118748.

- 623 17. Alaux C, Brunet J-L, Dussaubat C, Mondet F, Tchamitchan S, Cousin M, *et al.* (2010) Interactions  
624 between *Nosema* microspores and a neonicotinoid weaken honeybees (*Apis mellifera*). *Environ*  
625 *Microbiol* 12:774–782.
- 626 18. Collison E, Hird H, Cresswell J, Tyler C (2015) Interactive effects of pesticide exposure and pathogen  
627 infection on bee health – a critical analysis. *Biol Rev* 91(4):1006-1019. doi: 10.1111/brv.12206.
- 628 19. Pettis JS, vanEngelsdorp D, Johnson J, Dively G (2012) Pesticide exposure in honey bees results in  
629 increased levels of the gut pathogen *Nosema*. *Naturwissenschaften* 99: 153-158.
- 630 20. Colin T, Meikle WG, Paten AM, Barron AB (2019) Long-term dynamics of honey bee colonies  
631 following exposure to chemical stress. *Sci Total Environ* 667:660-670.  
632 doi:10.1016/j.scitotenv.2019.04.402.
- 633 21. Colin T, Meikle WG, Wu X, Barron AB (2019) Traces of a neonicotinoid induce precocious foraging  
634 and reduce foraging performance in honey bees. *Environ Sci Technol* 53(14): 8252-8261.  
635 doi:10.1021/acs.est.9b02452.
- 636 22. Meikle WG, Adamczyk JJ, Weiss M, Gregorc A, Johnson DR, Stewart SD, *et al.* (2016a) Sublethal  
637 effects of imidacloprid on honey bee colony growth and activity at three sites in the U.S. *PLOS ONE*  
638 11(12): e0168603. doi:10.1371/journal.pone.0168603.
- 639 23. Osterman J, Wintermantel D, Locke B, Jonsson O, Semberg E, Onorati P, *et al.* (2019) Clothianidin  
640 seed-treatment has no detectable negative impact on honeybee colonies and their pathogens  
641 *Nature Comm* 10(1):692. doi:10.1038/s41467-019-08523-4.
- 642 24. Siede R, Meixner MD, Almanza MT, Schöning R, Maus C, Büchler R (2018) A long-term field study on  
643 the effects of dietary exposure of clothianidin to varroosis-weakened honey bee colonies *Ecotoxicol*  
644 27(7):772-783. doi:10.1007/s10646-018-1937-1.



- 645 25. Wood SC, Kozii IV, de Mattos IM, Silva RCM, Klein CD, Dvylyuk I, *et al.* (2020) Chronic high-dose  
646 neonicotinoid exposure decreases overwinter survival of *Apis mellifera* L. *Insects* 11(1):30.  
647 doi:10.3390/insects11010030.
- 648 26. Rolke D, Fuchs S, Grünewald B, Gao Z, Blenau W (2016) Large-scale monitoring of effects of  
649 clothianidin-dressed oilseed rape seeds on pollinating insects in Northern Germany: effects on  
650 honey bees (*Apis mellifera*) *Ecotoxicol* 25(9):1648-1665. doi:10.1007/s10646-016-1725-8.
- 651 27. Odemer R, Nilles L, Linder N, Rosenkranz P (2018) Sublethal effects of clothianidin and *Nosema* spp.  
652 on the longevity and foraging activity of free flying honey bees. *Ecotoxicol* 27(5): 527-538.  
653 doi:10.1007/s10646-018-1925-5.
- 654 28. Meikle WG, Adamczyk JJ, Weiss M, Gregorc A (2018) Effects of bee density and sublethal  
655 imidacloprid exposure on cluster temperatures of caged honey bees. *Apidologie* 49(5): 581-593.  
656 doi:10.1007/s13592-018-0585-z.
- 657 29. Meikle WG, Corby-Harris V, Carroll MJ, Weiss M, Snyder LA, Meador CAD, *et al.* (2019) Exposure to  
658 sublethal concentrations of methoxyfenozide disrupts honey bee colony activity and  
659 thermoregulation. *PLOS ONE* 14(3): e0204635, doi:10.1371/journal.pone.0204635.
- 660 30. Meikle WG, Weiss M (2017a) Monitoring colony-level effects of sublethal pesticide exposure on  
661 honey bees. *J Vis Exp* (129) e56355. doi:10.3791/56355.
- 662 31. Colin T, Bruce J, Meikle WG, Barron AB (2018) The development of honey bee colonies assessed  
663 using a new semi-automated brood counting method: CombCount. *PLOS ONE* 13(10): e0205816.  
664 doi:10.1371/journal.pone.0205816.
- 665 32. Meikle WG, Weiss M, Stillwell AR (2016b) Monitoring colony phenology using within-day variability  
666 in continuous weight and temperature of honey bee hives. *Apidologie* 47:1-14. doi:10.1007/s13592-  
667 015-0370-1.

- 668 33. Calabrese EJ, Baldwin LA (2003) Hormesis: The dose-response revolution. *Annu Rev Pharmacol*  
669 *Toxicol* 43:175–97. doi:10.1146/annurev.pharmtox.43.100901.140223.
- 670 34. Seeley TD (1974) Atmospheric carbon dioxide concentration in honey bee (*Apis mellifera*) colonies. *J*  
671 *Insect Physiol* 20:2301- 2305.
- 672 35. Van Nerum K, Buelens H (1997) Hypoxia-controlled winter metabolism in honeybees (*Apis mellifera*).  
673 *Comp Biochem Physiol* 117A(4):445–455.
- 674 36. Kronenberg F, Heller HC (1982) Colonial thermoregulation in honey bees (*Apis mellifera*). *J Comp*  
675 *Physiol B* 148:65–76.
- 676 37. Southwick EE, Moritz RFA (1987) Social control of air ventilation in colonies of honey bees (*Apis*  
677 *mellifera*), *J. Insect Physiol.* 33(9), 623-626.
- 678 38. Alburaki M, Chen D, Skinner JA, Meikle WG, Tarpy DR, Adamczyk JJ *et al.* (2018) Honey bee survival  
679 and pathogen prevalence: From the perspective of landscape and exposure to pesticides. *Insects*  
680 9(2), 65. doi:10.3390/insects9020065.
- 681 39. Alburaki M, Steckel SJ, Williams MT, Skinner JA, Kelly H, Lorenz G *et al.* (2017) Agricultural landscape  
682 and pesticide effects on honey bee (Hymenoptera: Apidae) biological traits. *J Econ Entomol* 110(3):  
683 835–847. doi:10.1093/jee/tox111.
- 684 40. Meikle WG, Weiss M, Beren E (2020) Landscape factors influencing honey bee colony behavior in  
685 Southern California commercial apiaries. *Sci Rep* 10: 5013. doi:10.1038/s41598-020-61716-6.
- 686 41. Meikle WG, Weiss M, Maes PW, Fitz W, Snyder LA, Sheehan T, *et al.* (2017b) Internal hive  
687 temperature as a means of monitoring honey bee colony health in a migratory beekeeping  
688 operation before and during winter. *Apidologie* 48:666–680. doi:10.1007/s13592-017-0512-8.
- 689 42. Ricigliano VA, Mott BM, Maes P, Floyd AS, Fitz W, Copeland DC *et al.* (2019) Honey bee colony  
690 performance and health are enhanced by apiary proximity to US Conservation Reserve Program  
691 (CRP) lands. *Sci Rep* 9: 4894. doi:10.1038/s41598-019-41281-3.



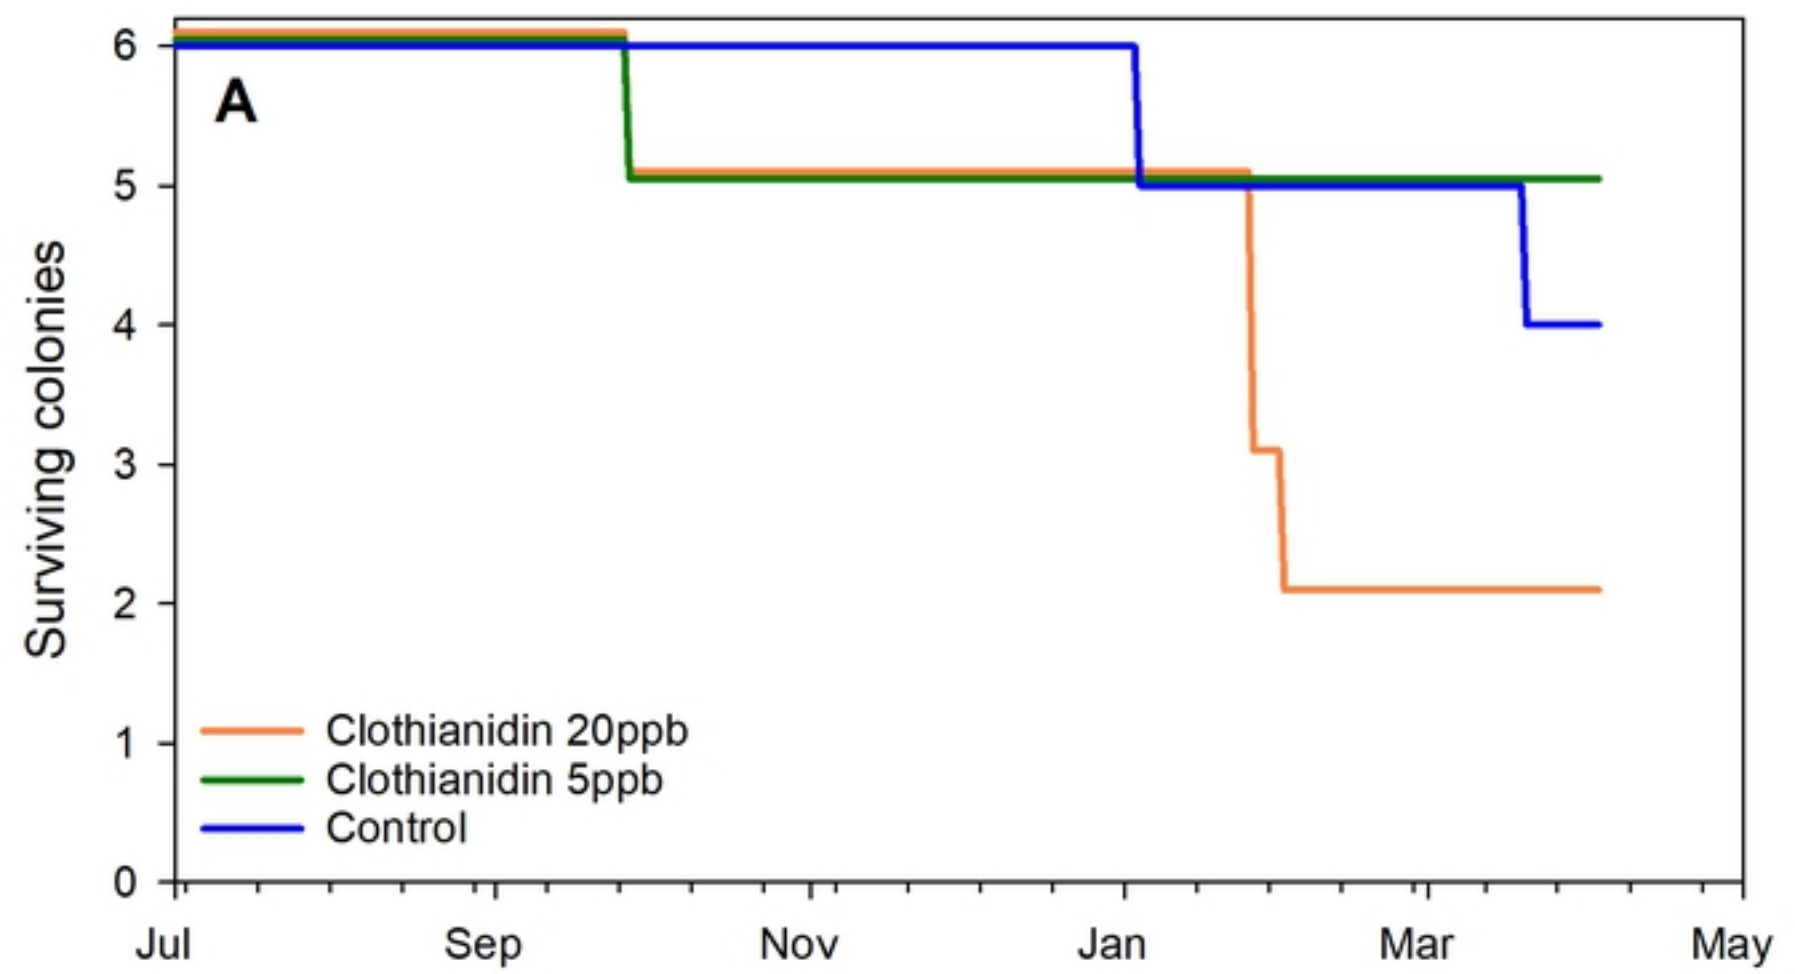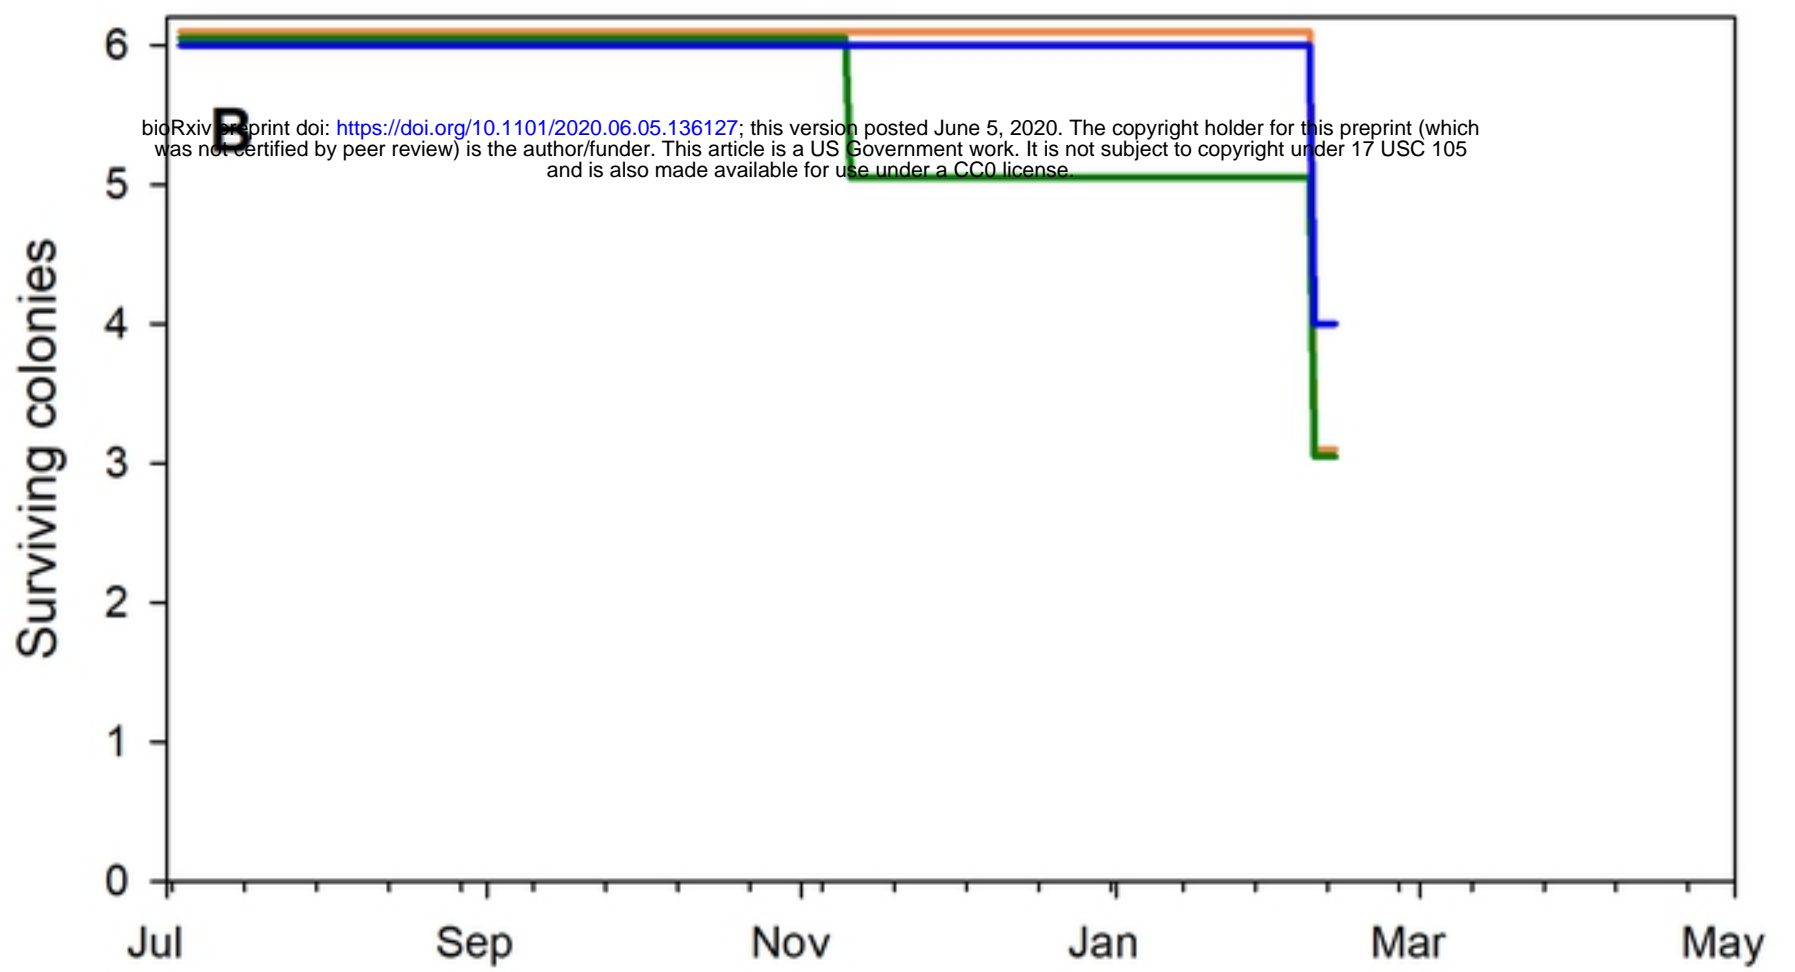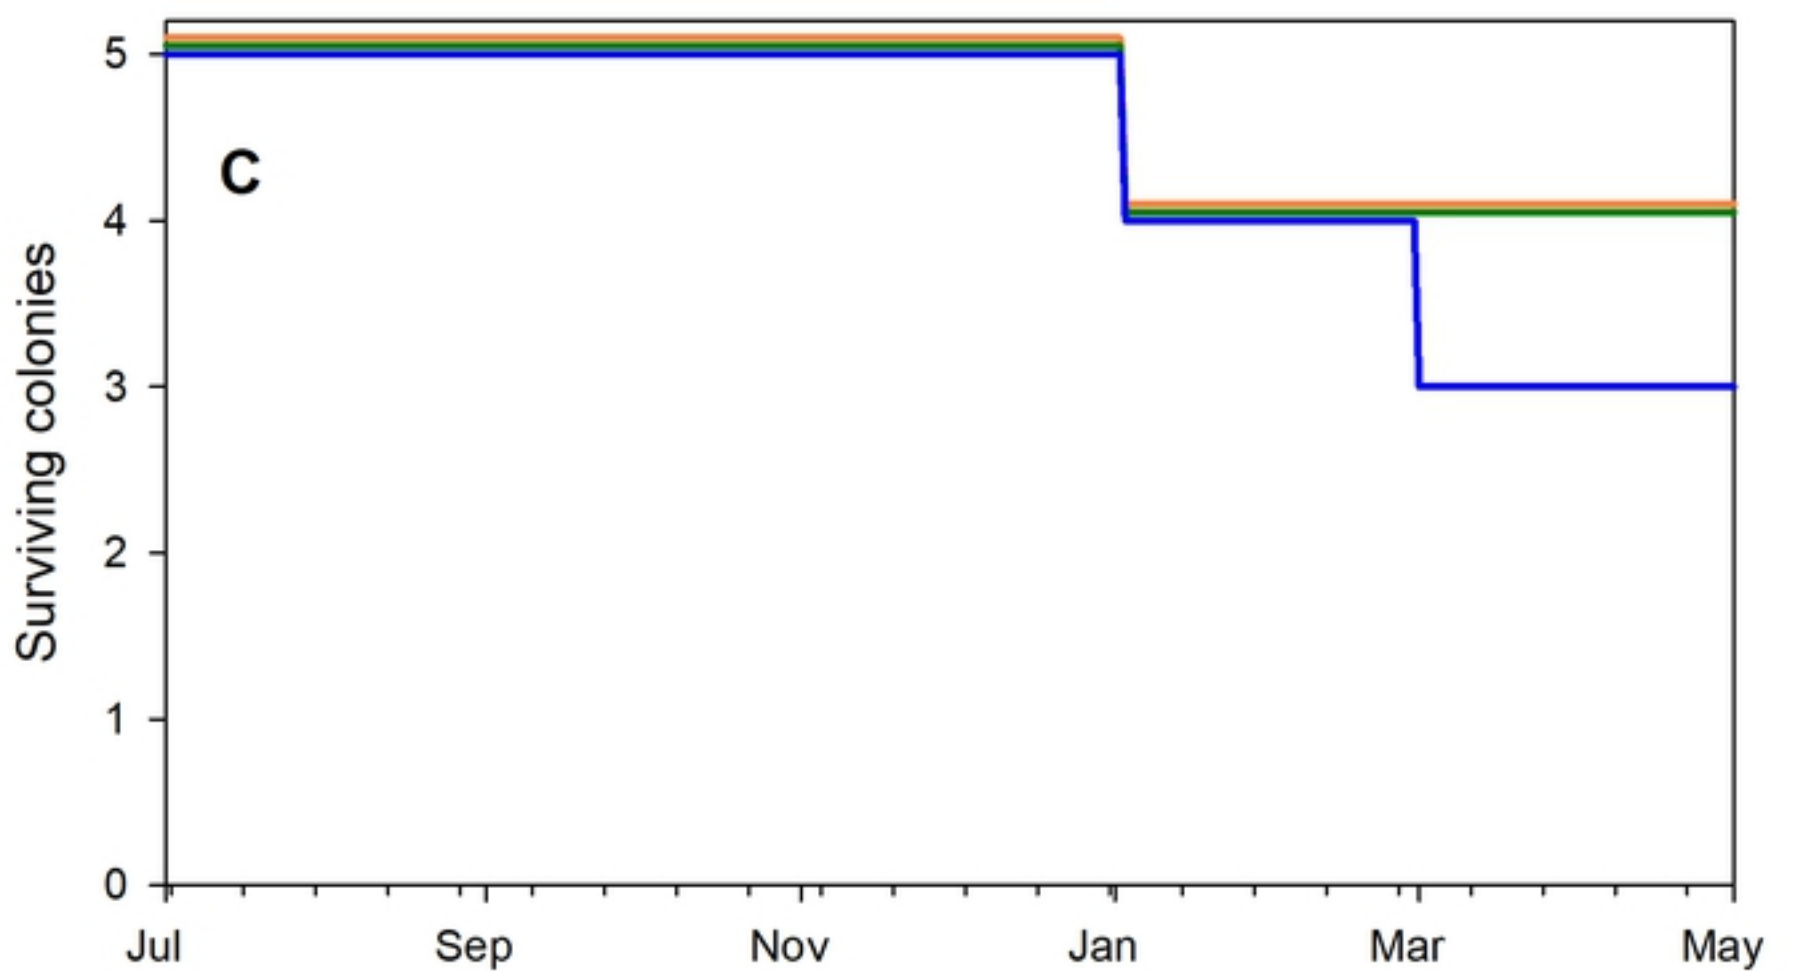

Figure 1

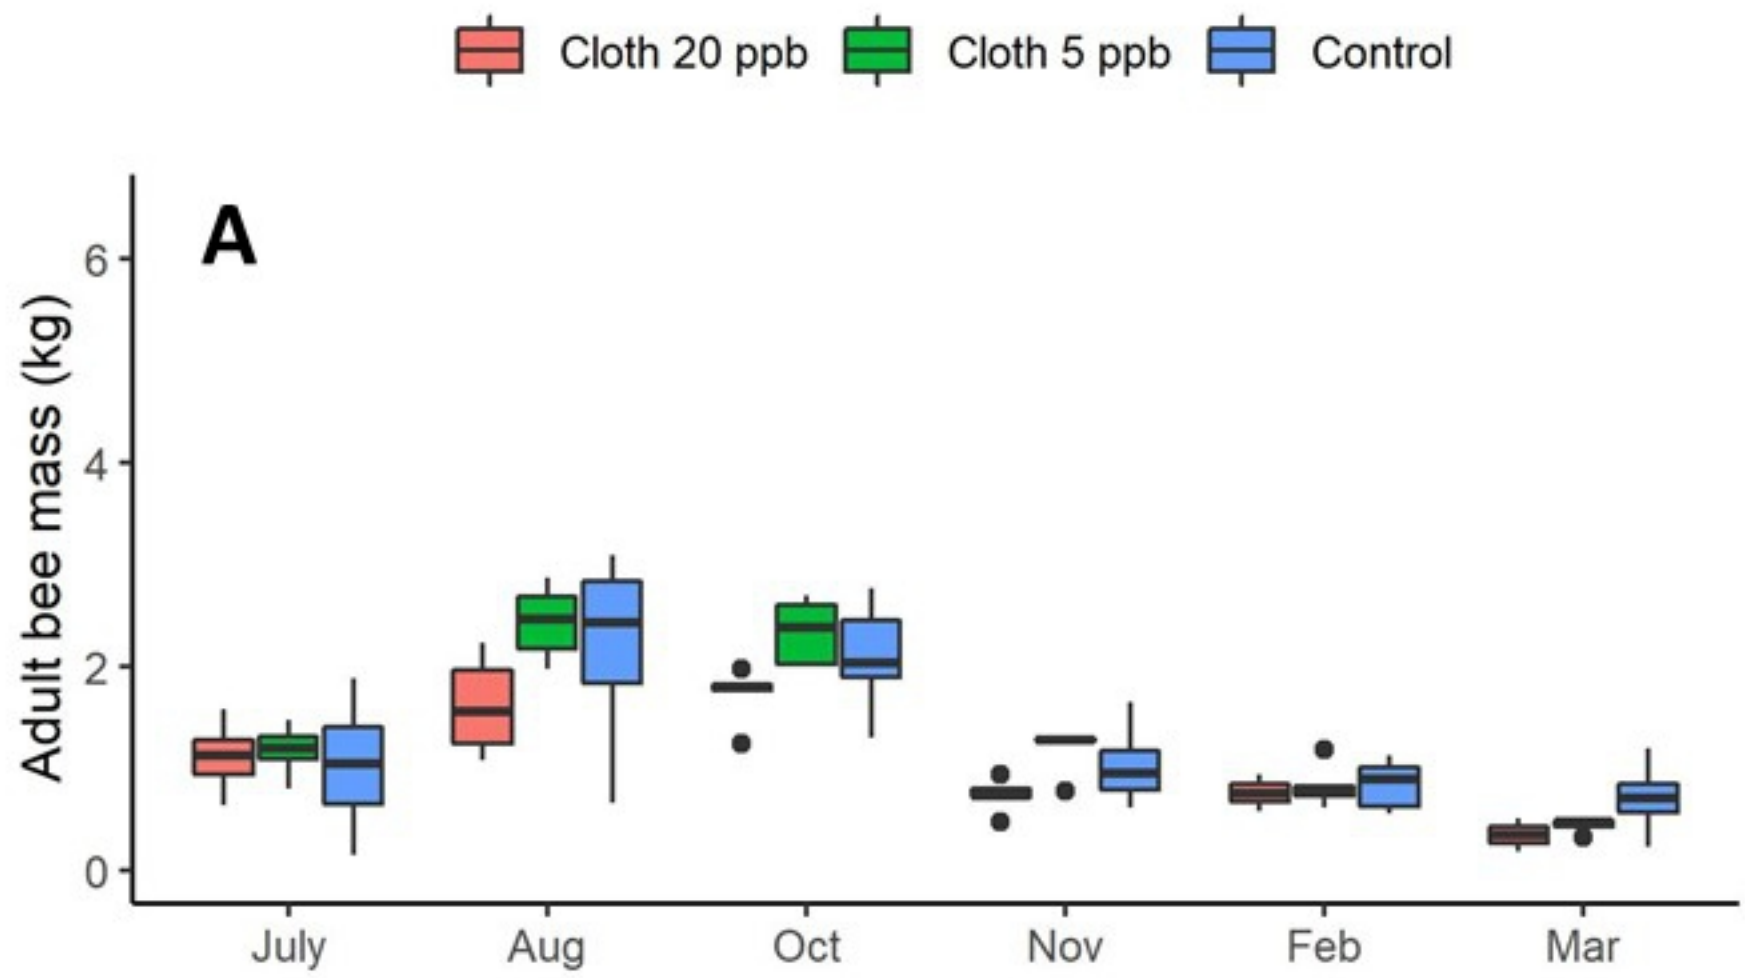

bioRxiv preprint doi: <https://doi.org/10.1101/2020.06.05.136127>; this version posted June 5, 2020. The copyright holder for this preprint (which was not certified by peer review) is the author/funder. This article is a US Government work. It is not subject to copyright under 17 USC 105 and is also made available for use under a CC0 license.

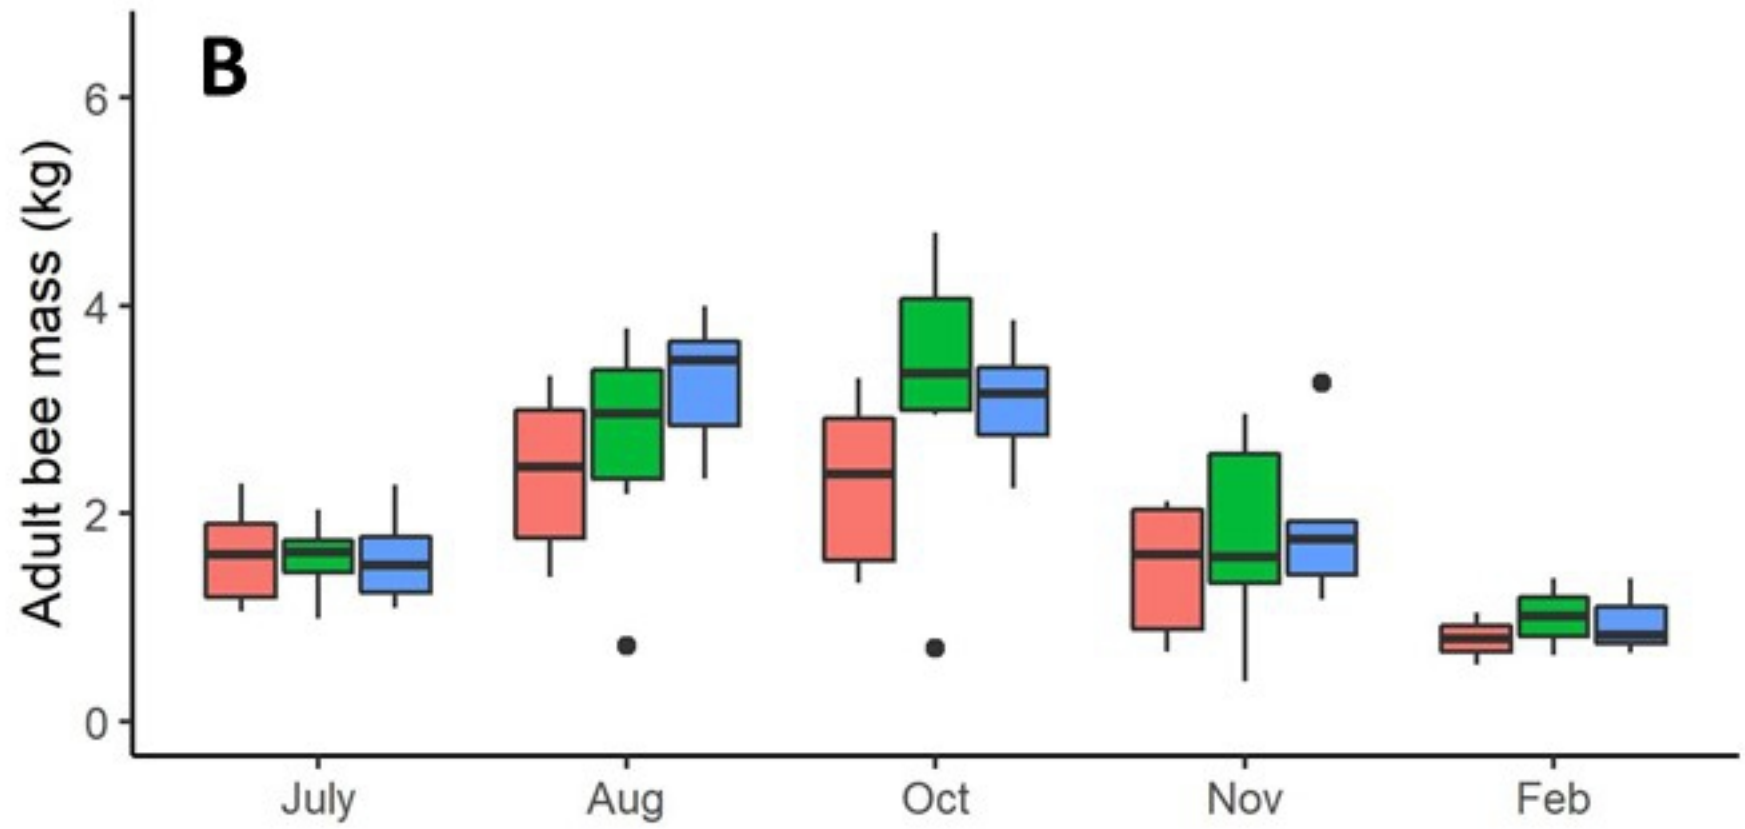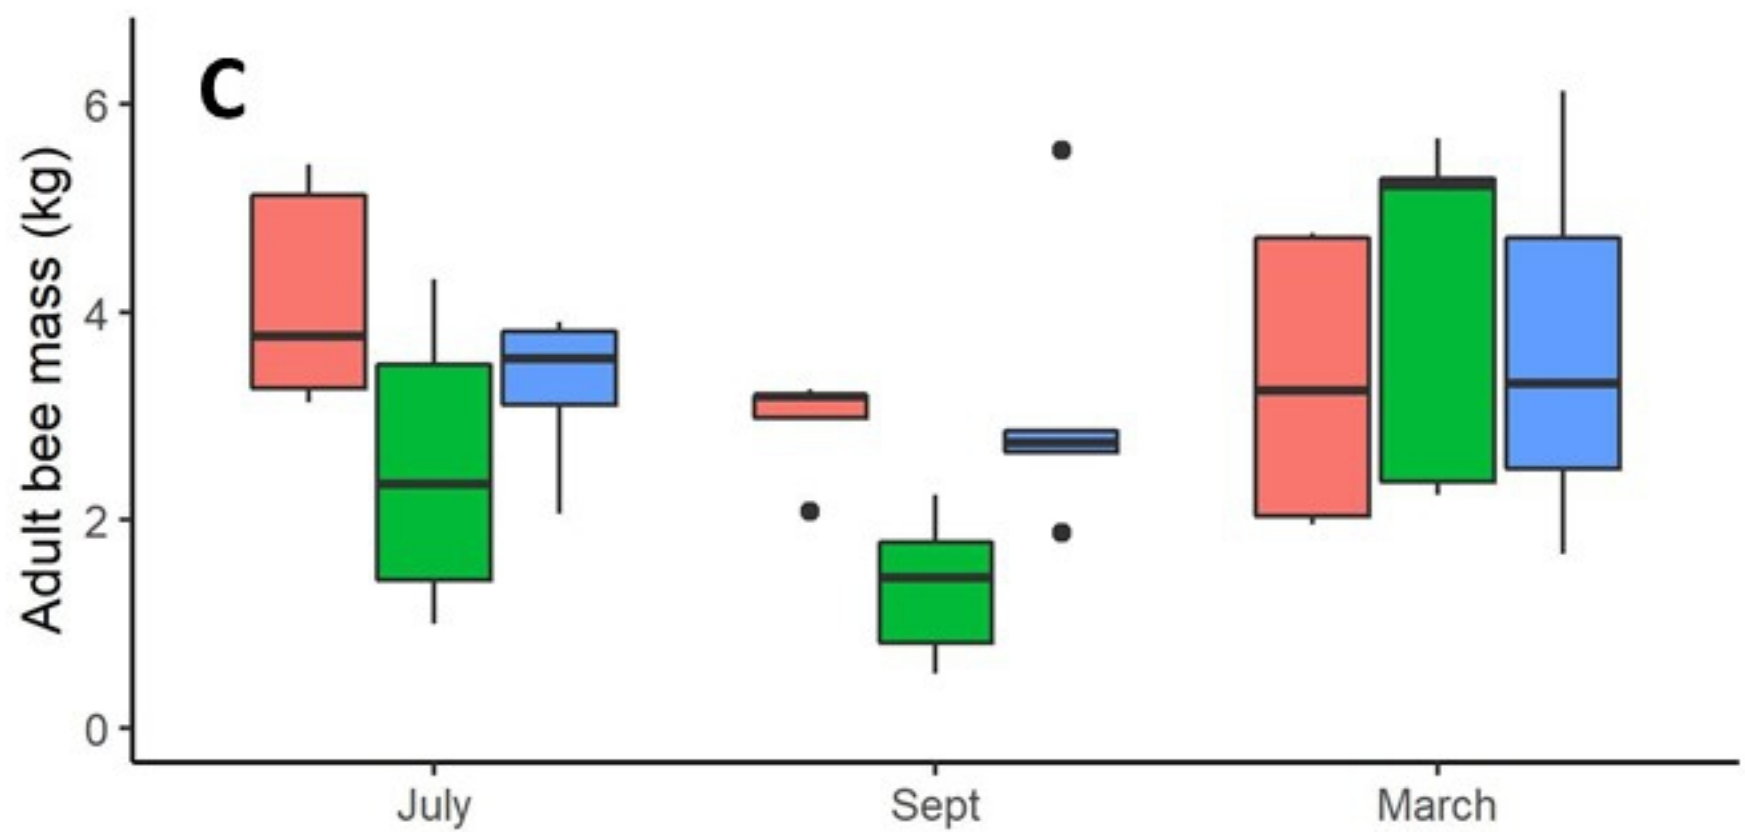

Figure 2

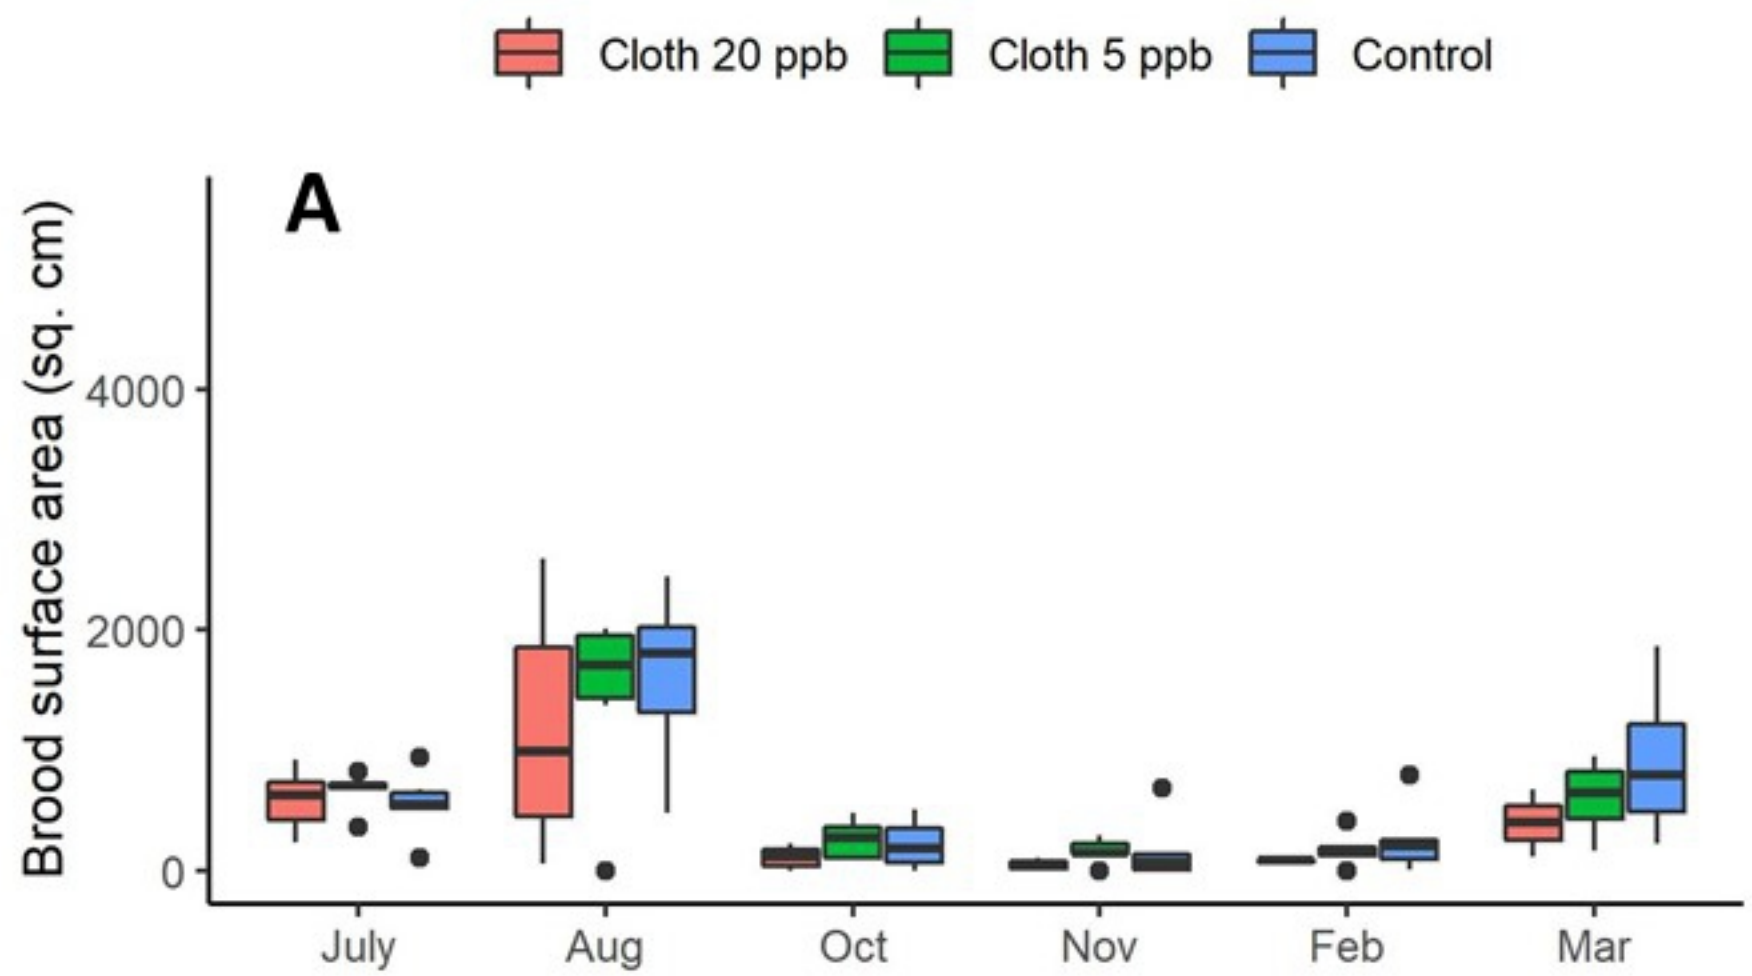

bioRxiv preprint doi: <https://doi.org/10.1101/2020.06.05.136127>; this version posted June 5, 2020. The copyright holder for this preprint (which was not certified by peer review) is the author/funder. This article is a US Government work. It is not subject to copyright under 17 USC 105 and is also made available for use under a CC0 license.

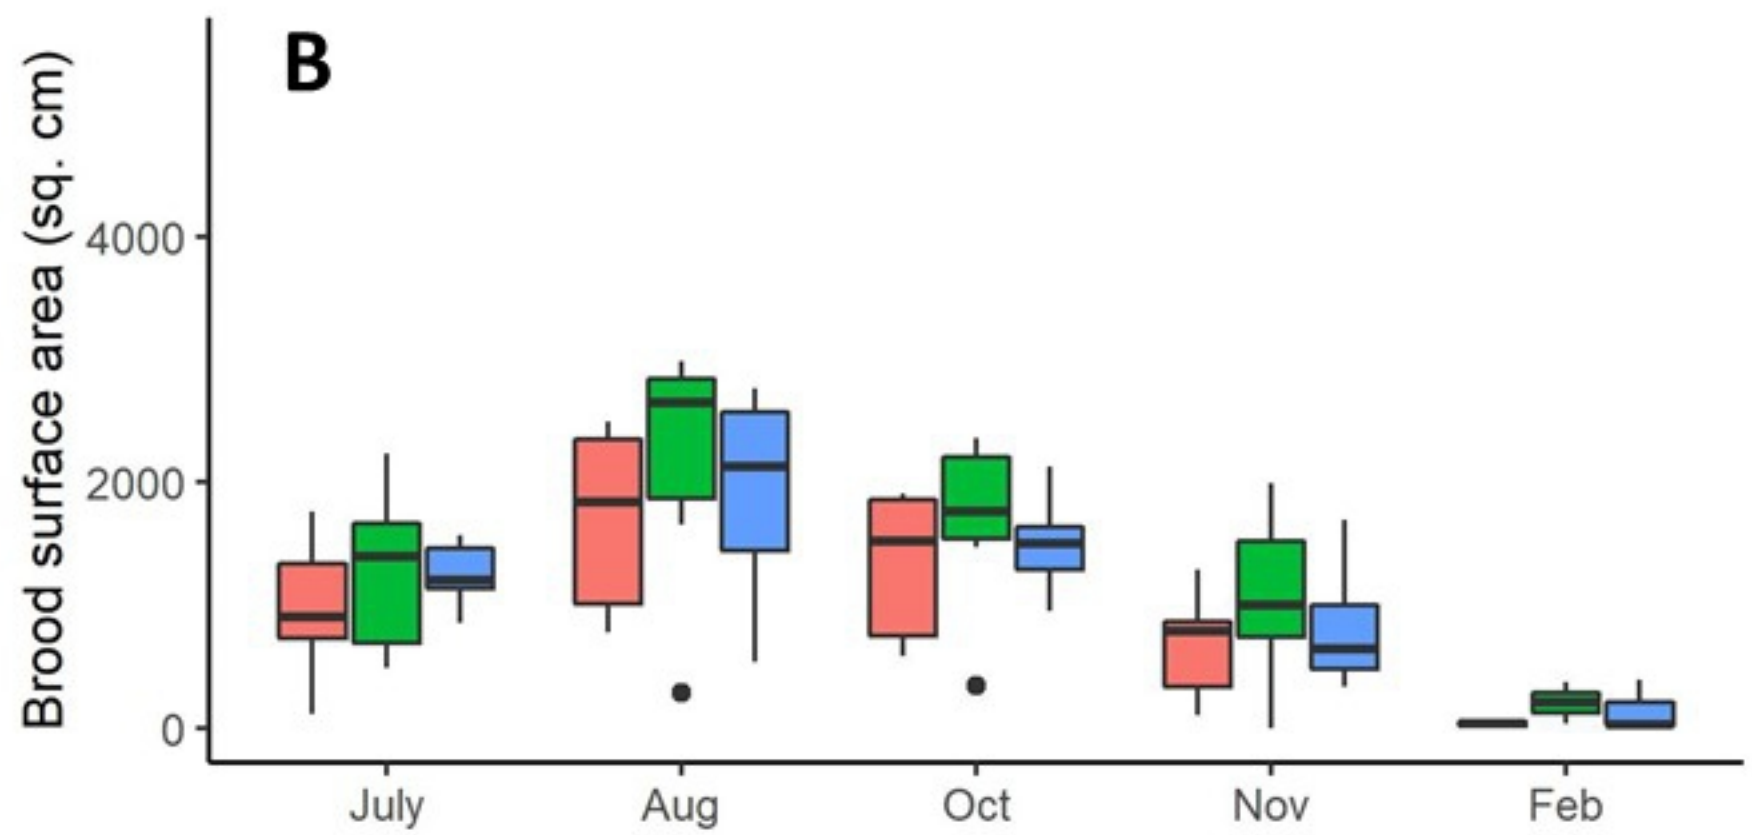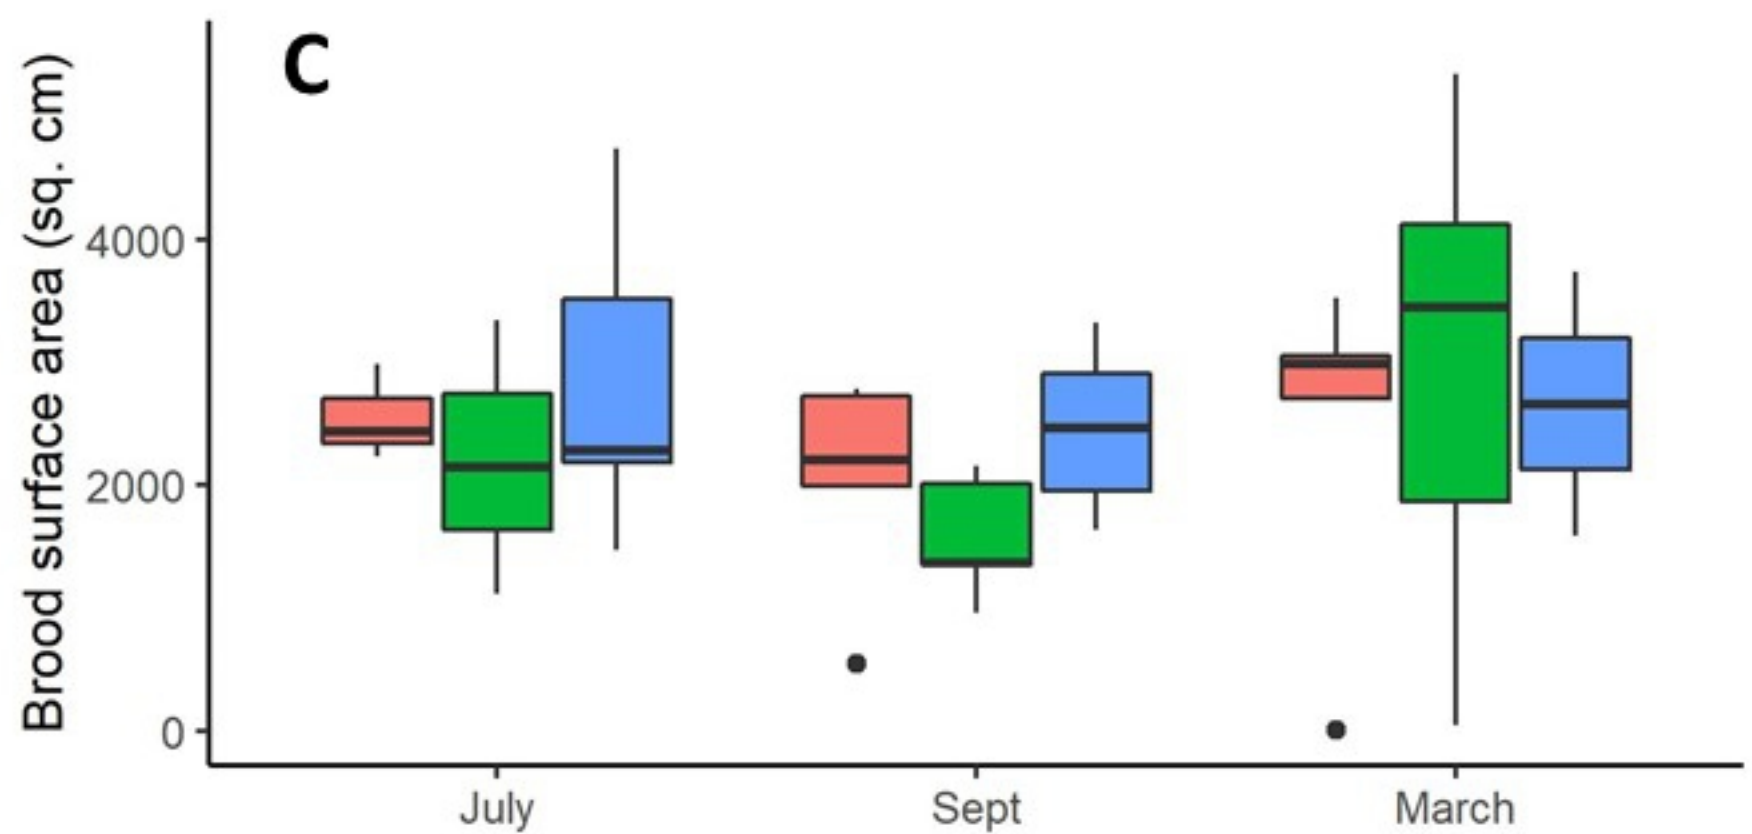

Figure 3

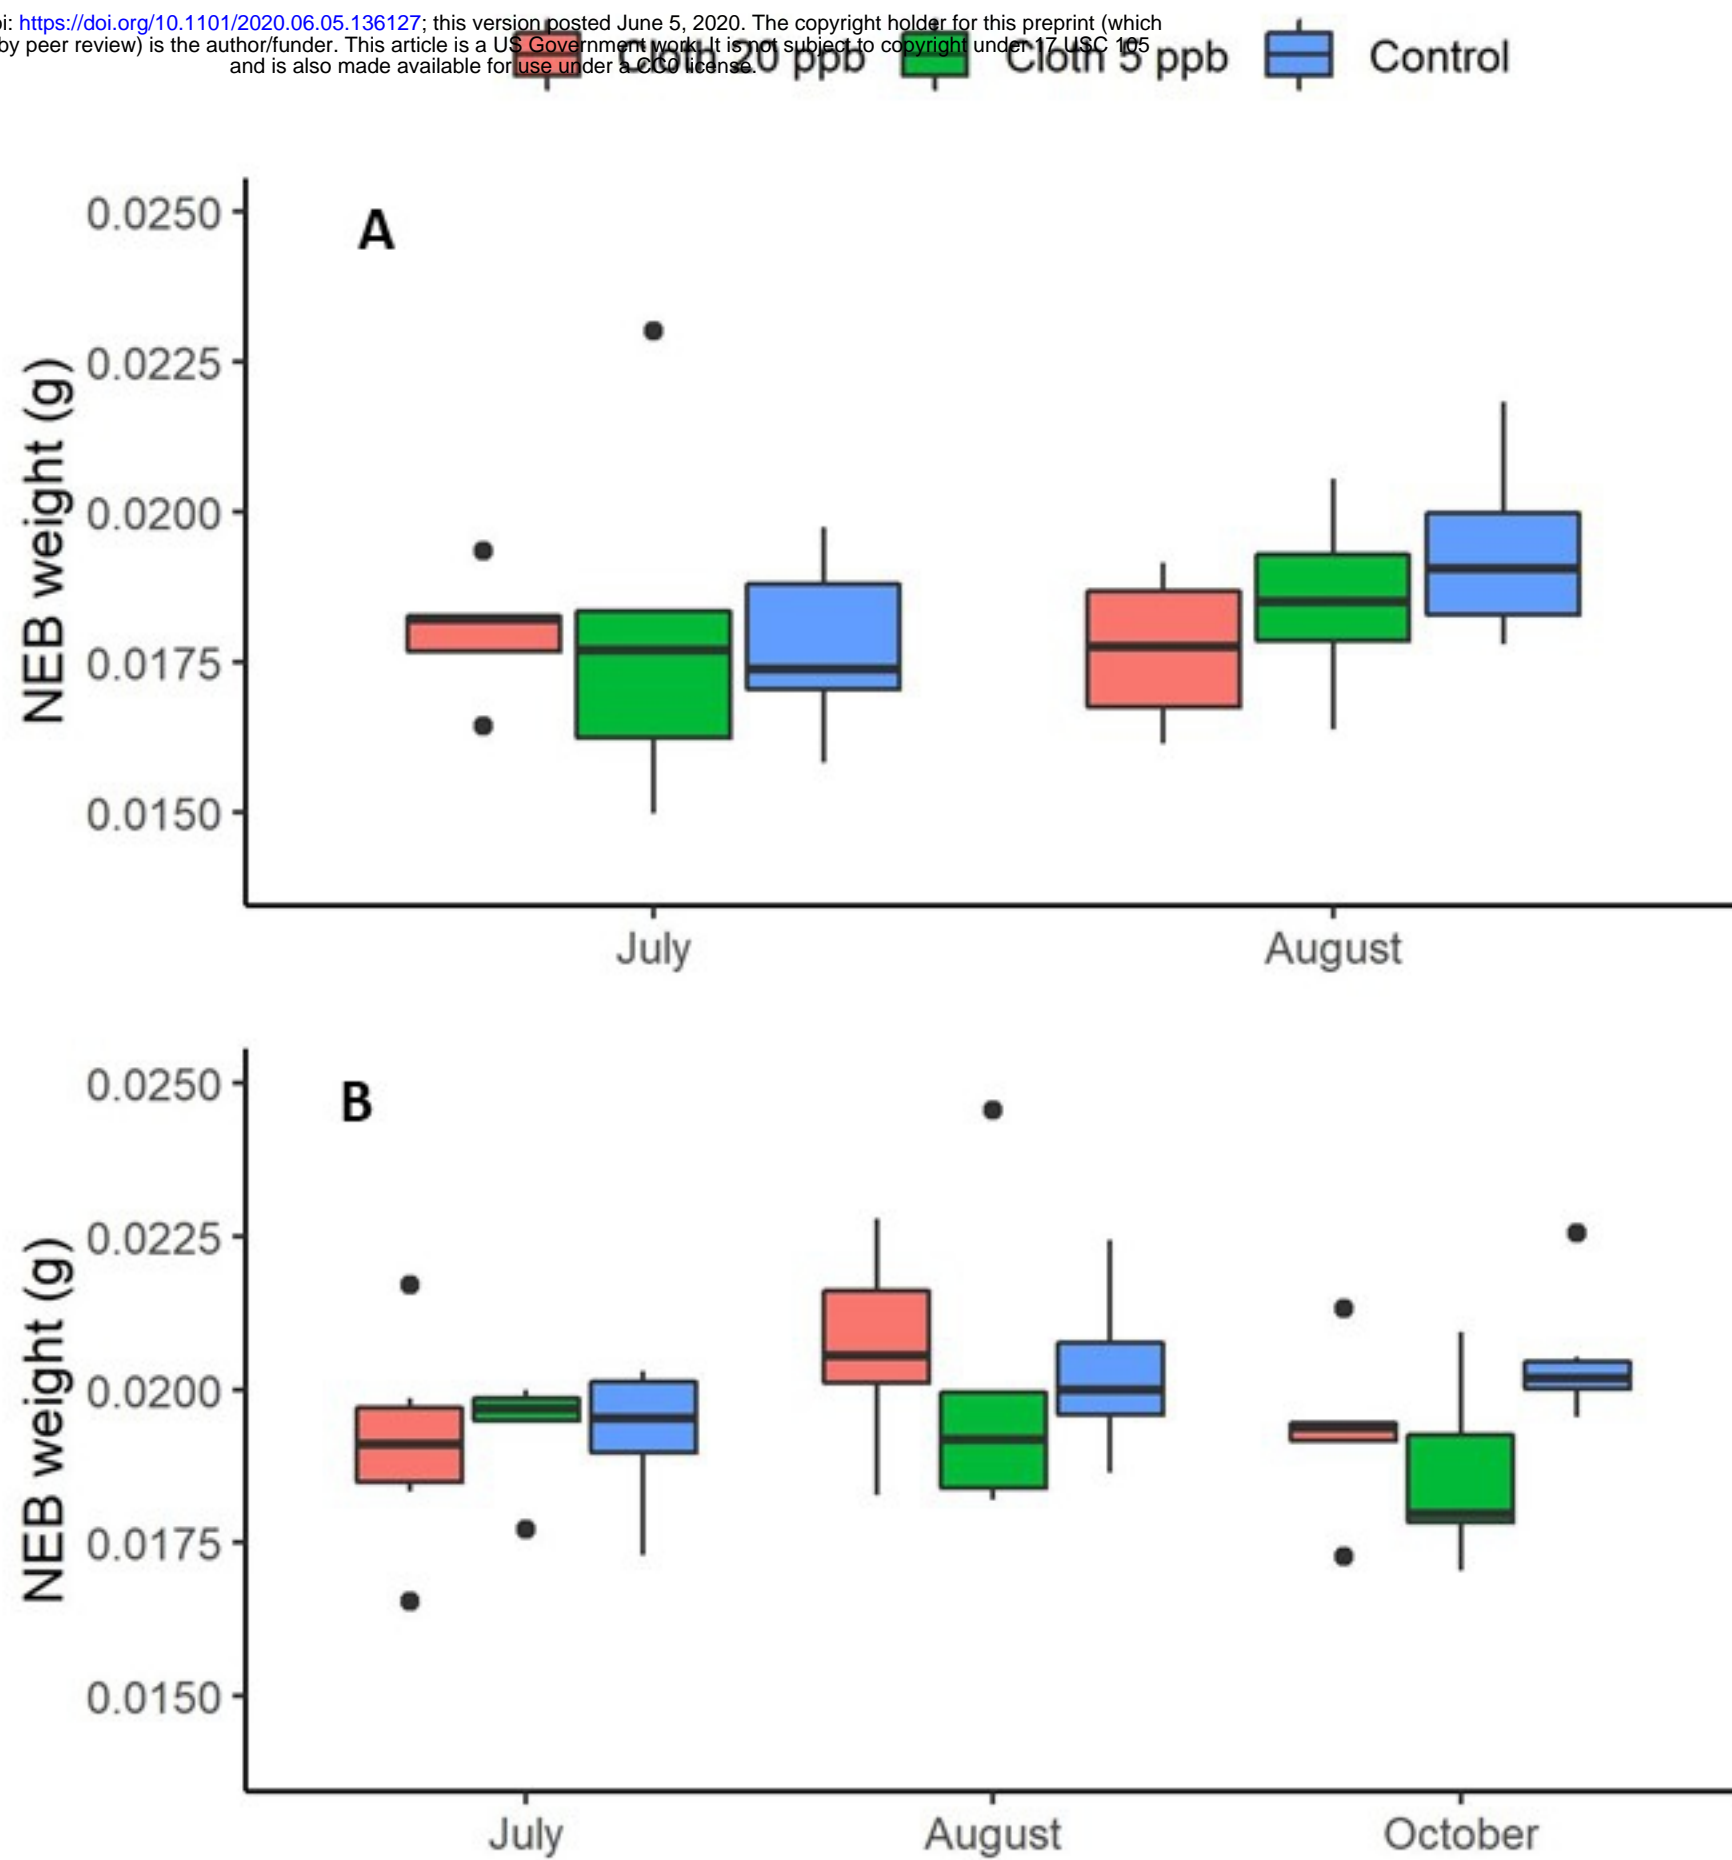

Figure 4

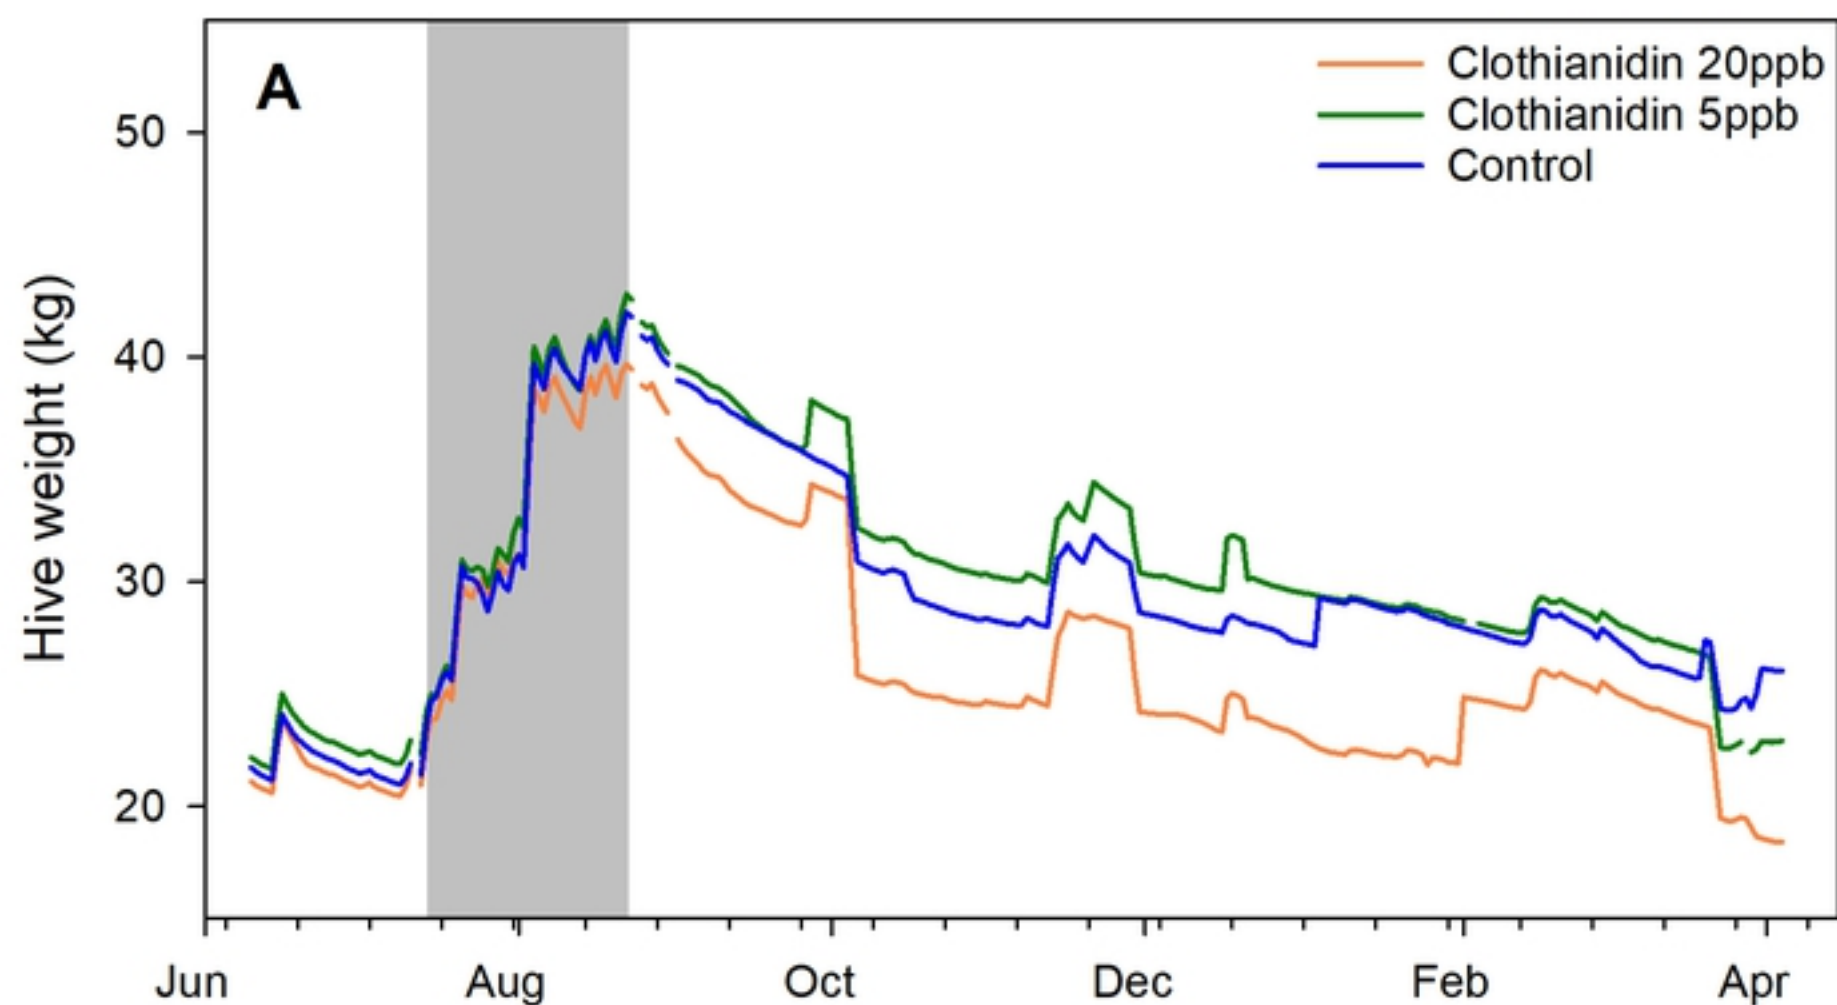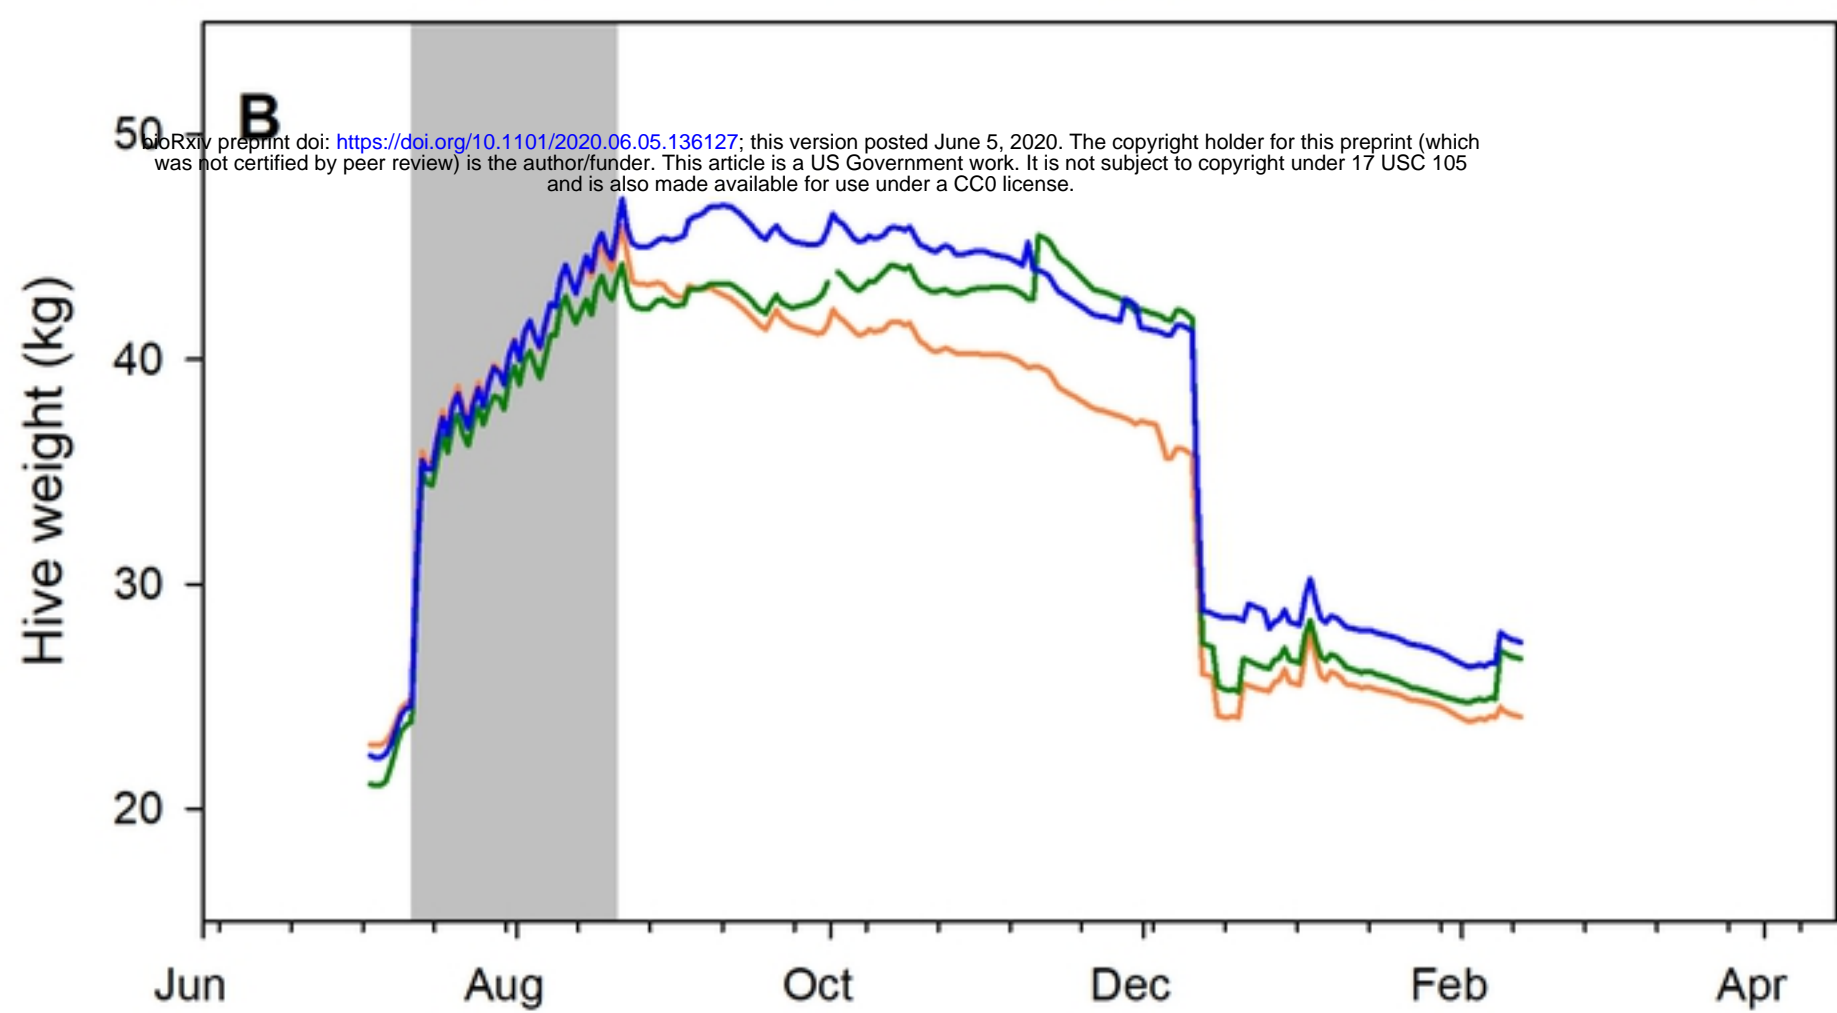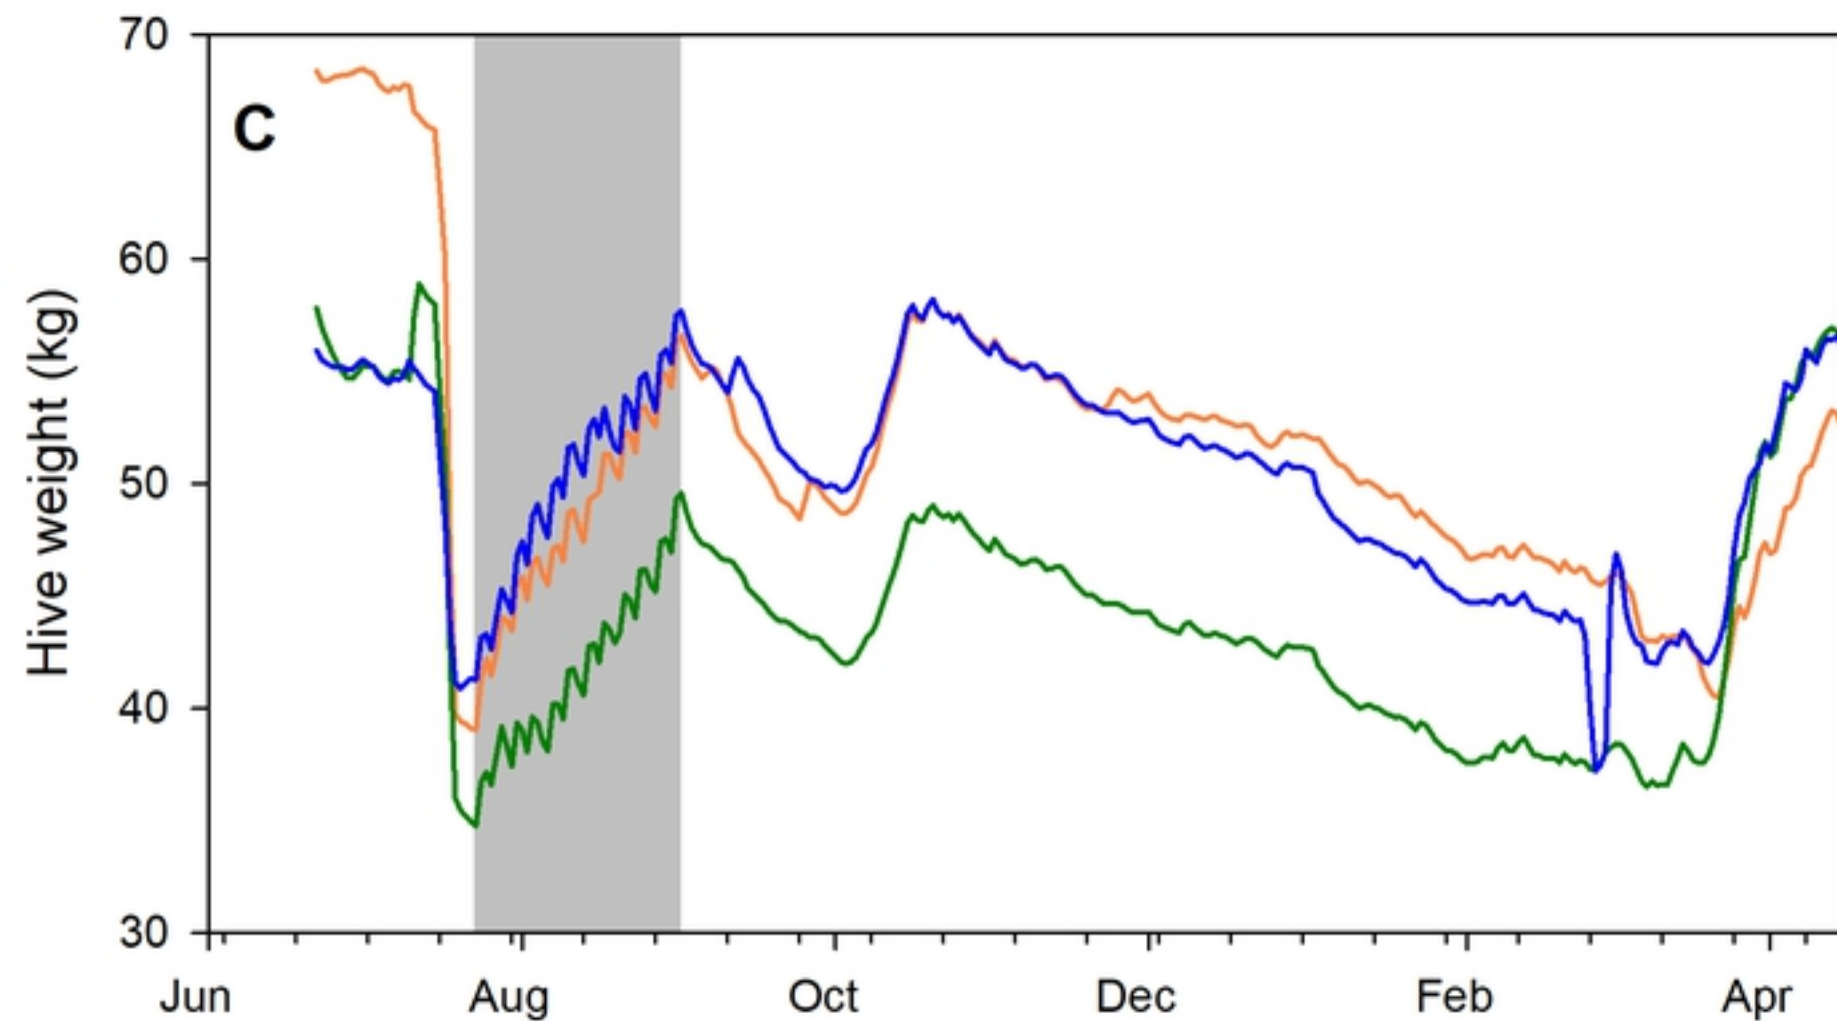

Figure 5



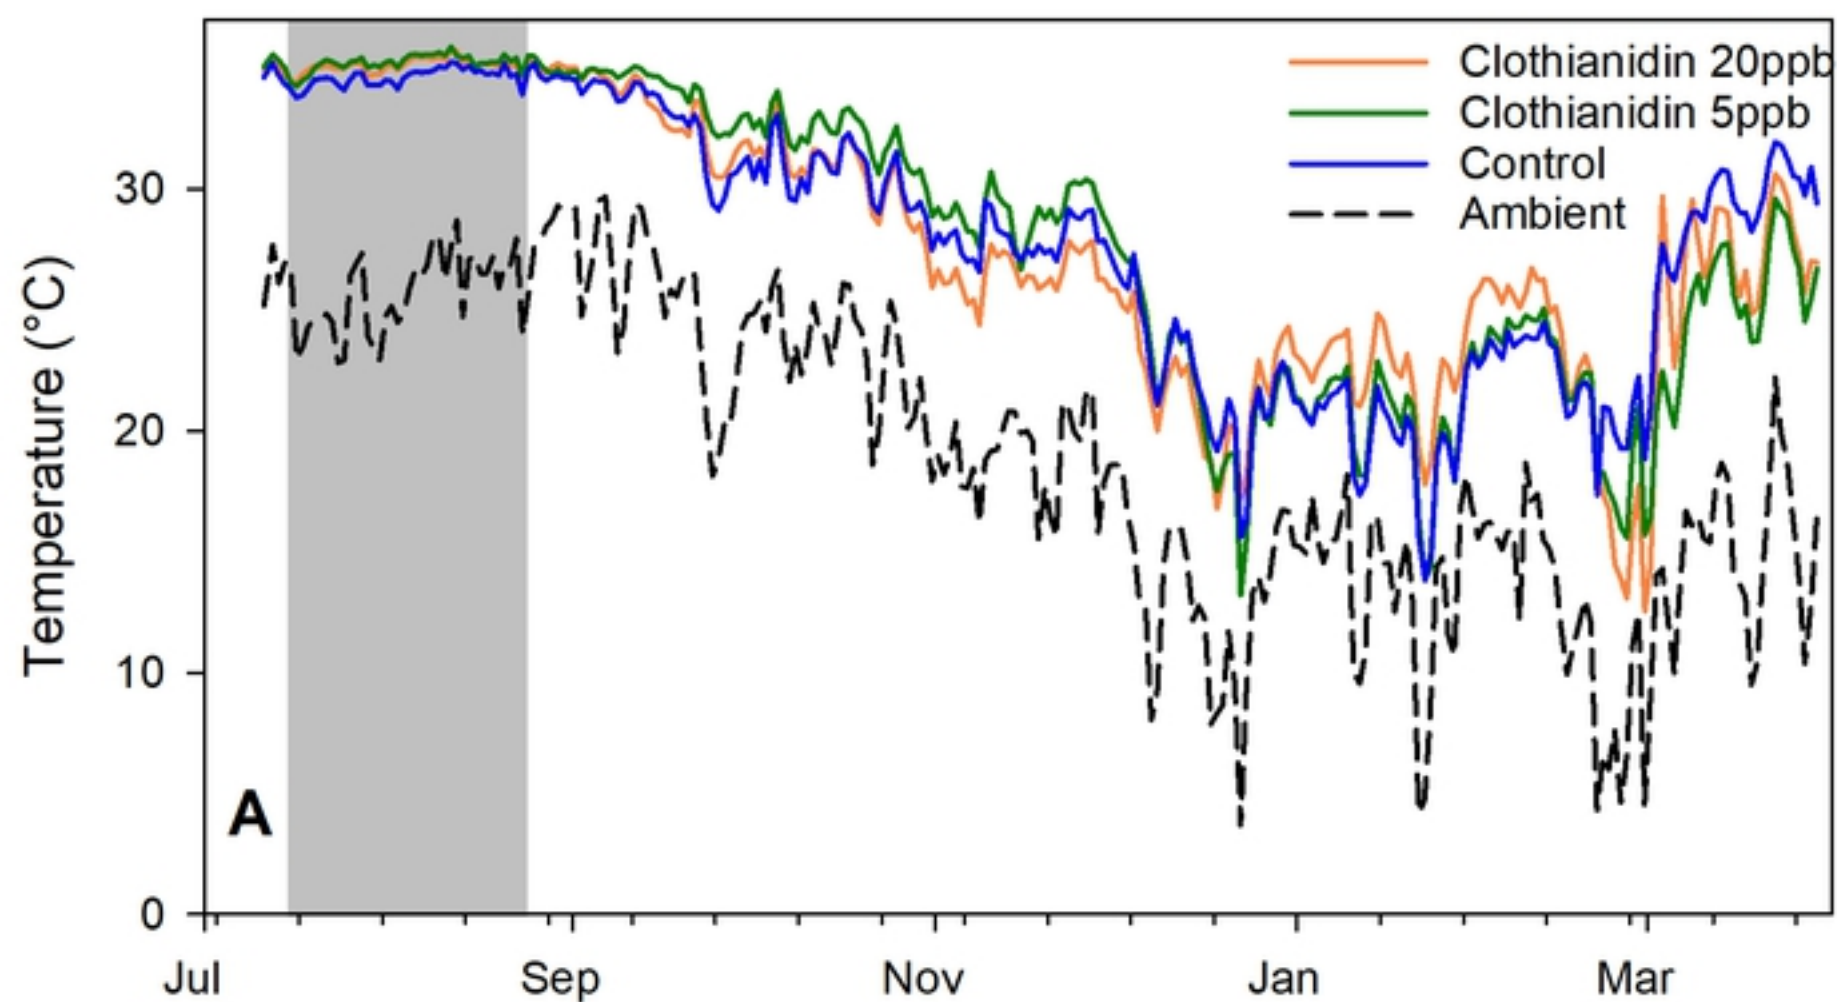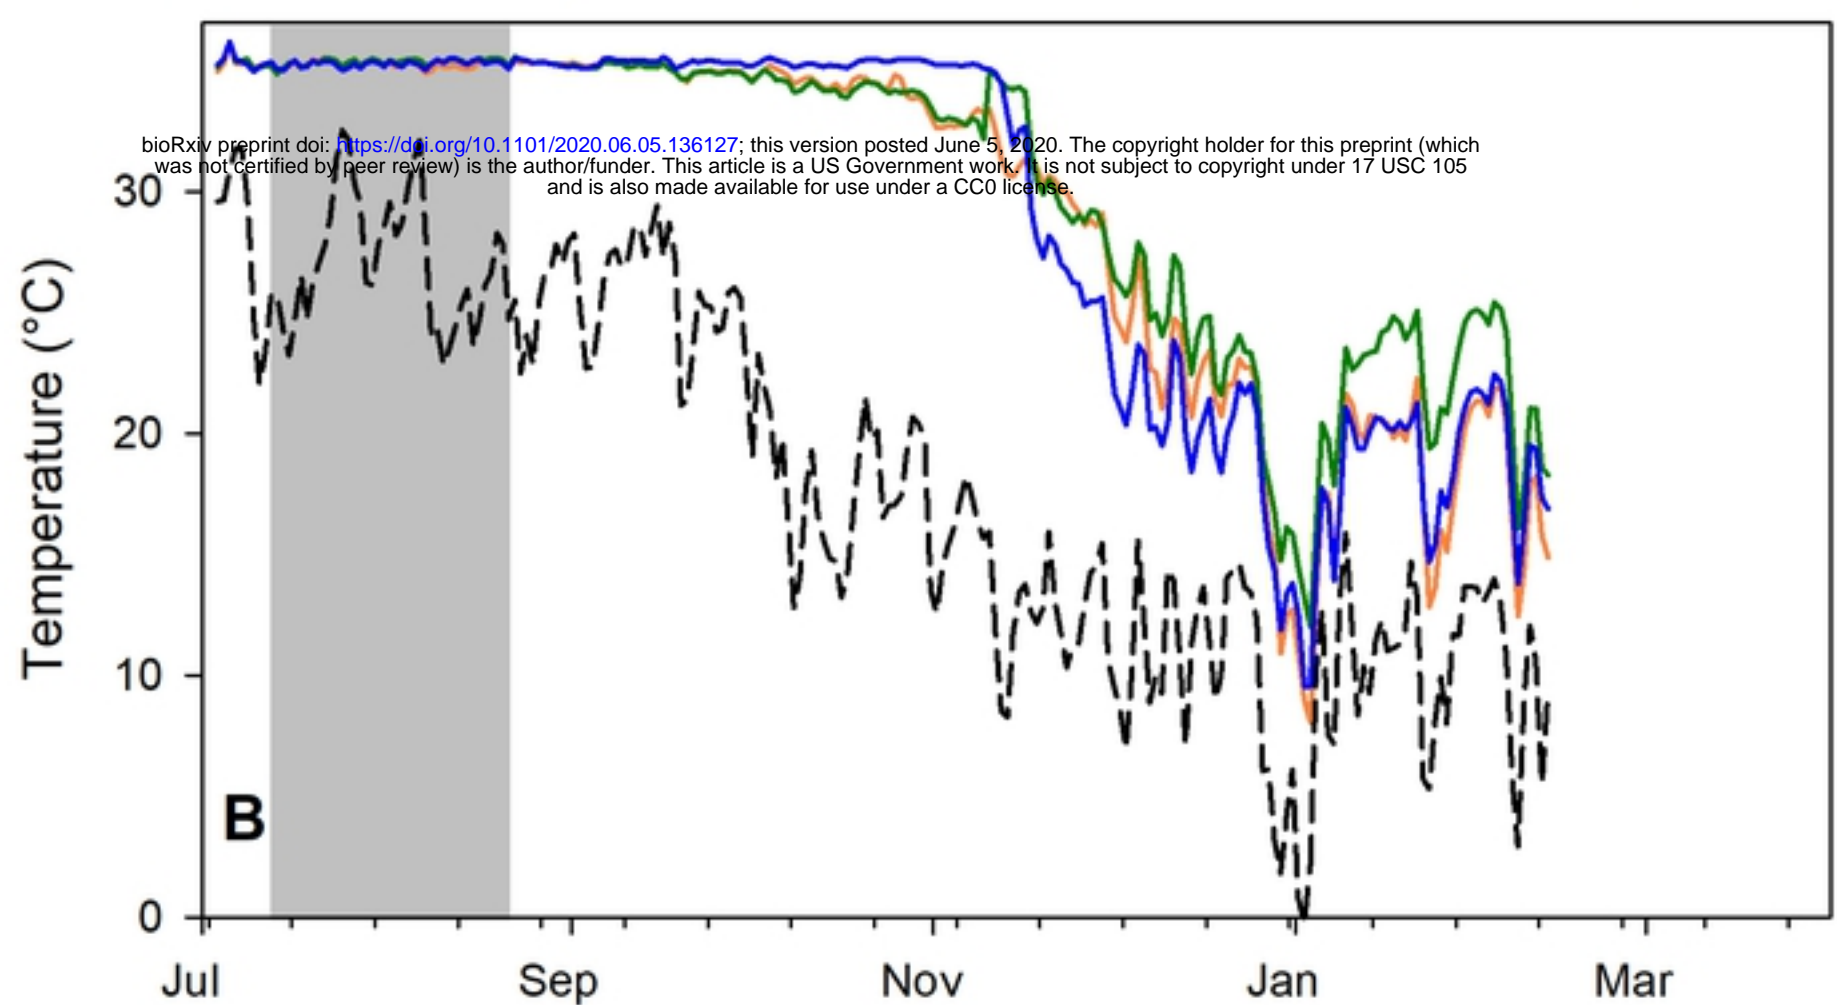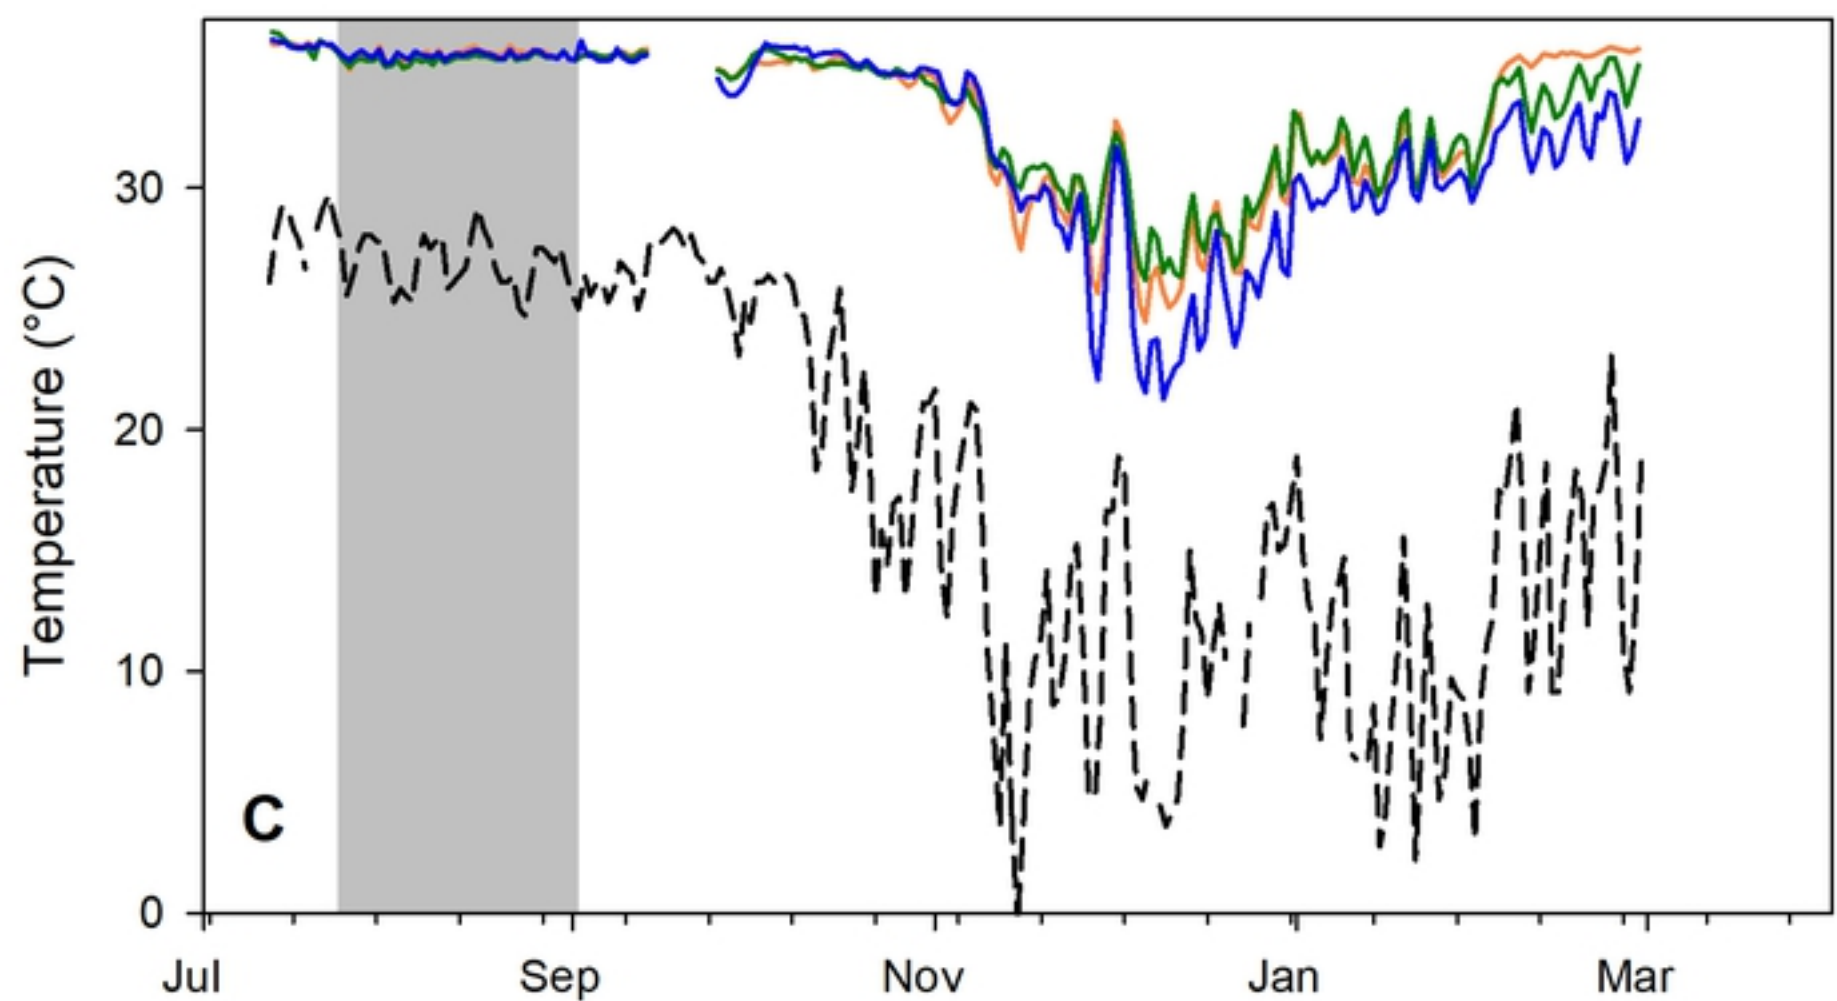

bioRxiv preprint doi: <https://doi.org/10.1101/2020.06.05.136127>; this version posted June 5, 2020. The copyright holder for this preprint (which was not certified by peer review) is the author/funder. This article is a US Government work. It is not subject to copyright under 17 USC 105 and is also made available for use under a CC0 license.

Figure 6

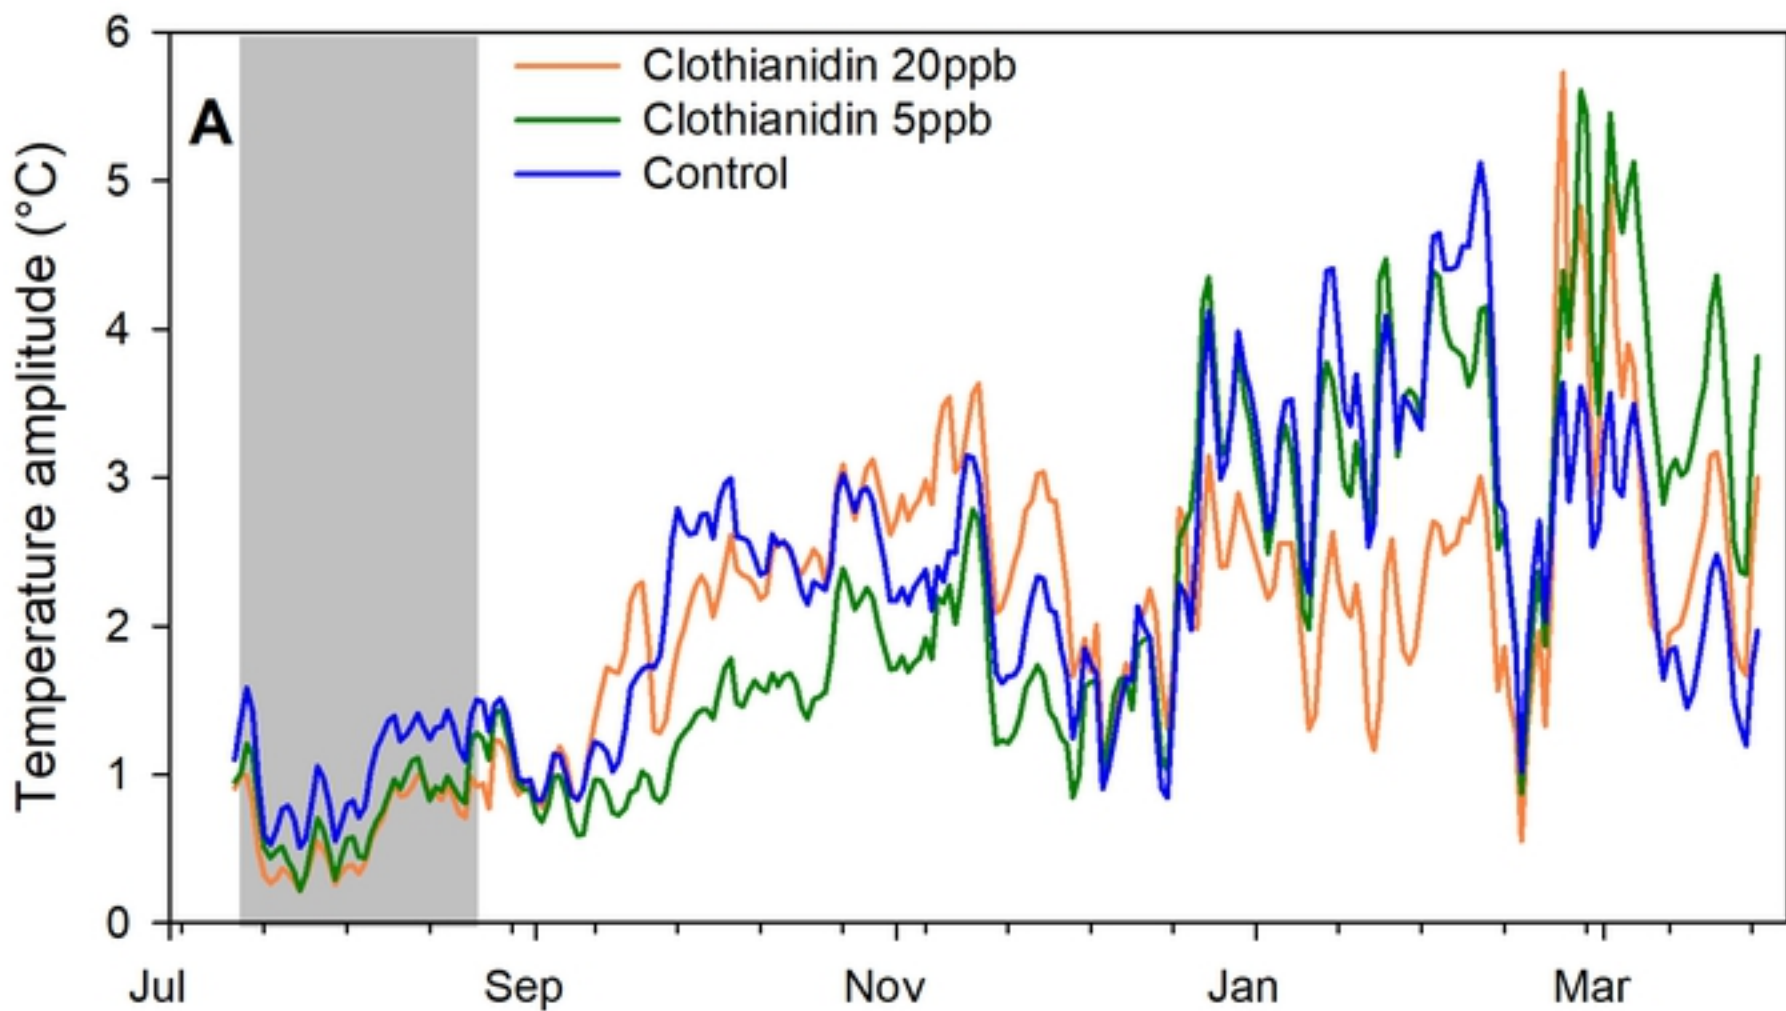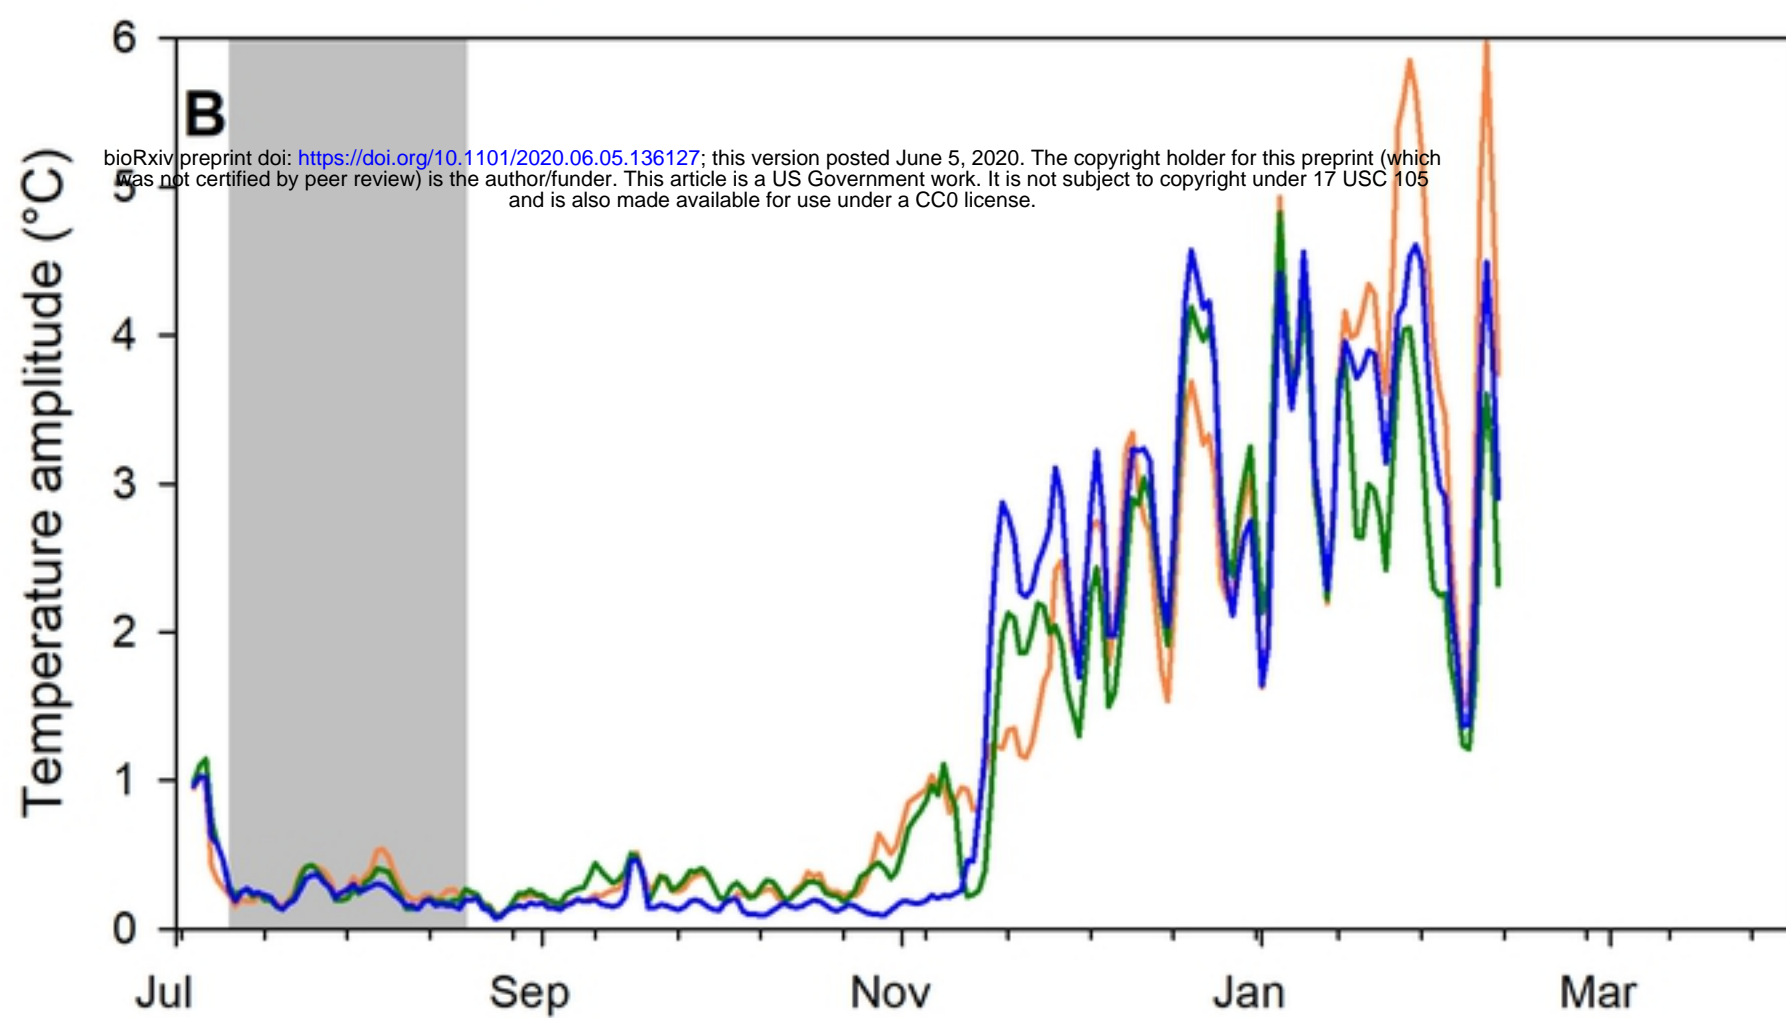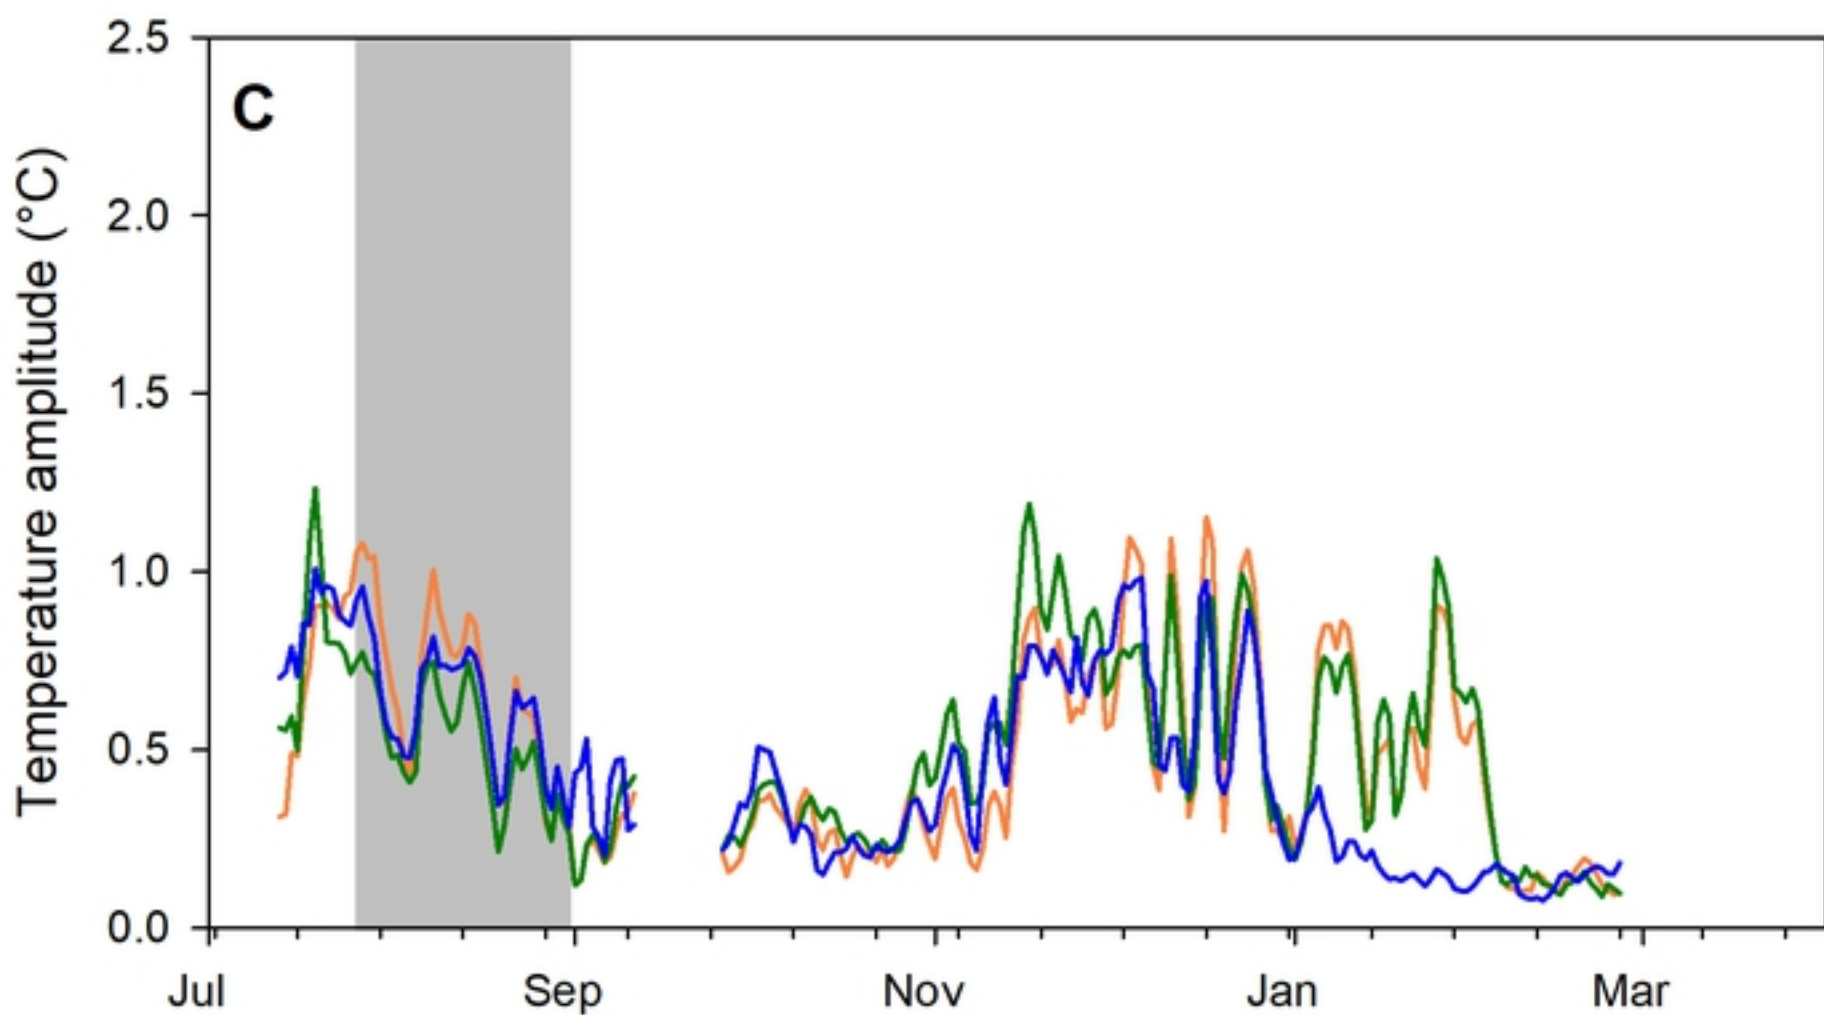

Figure 7

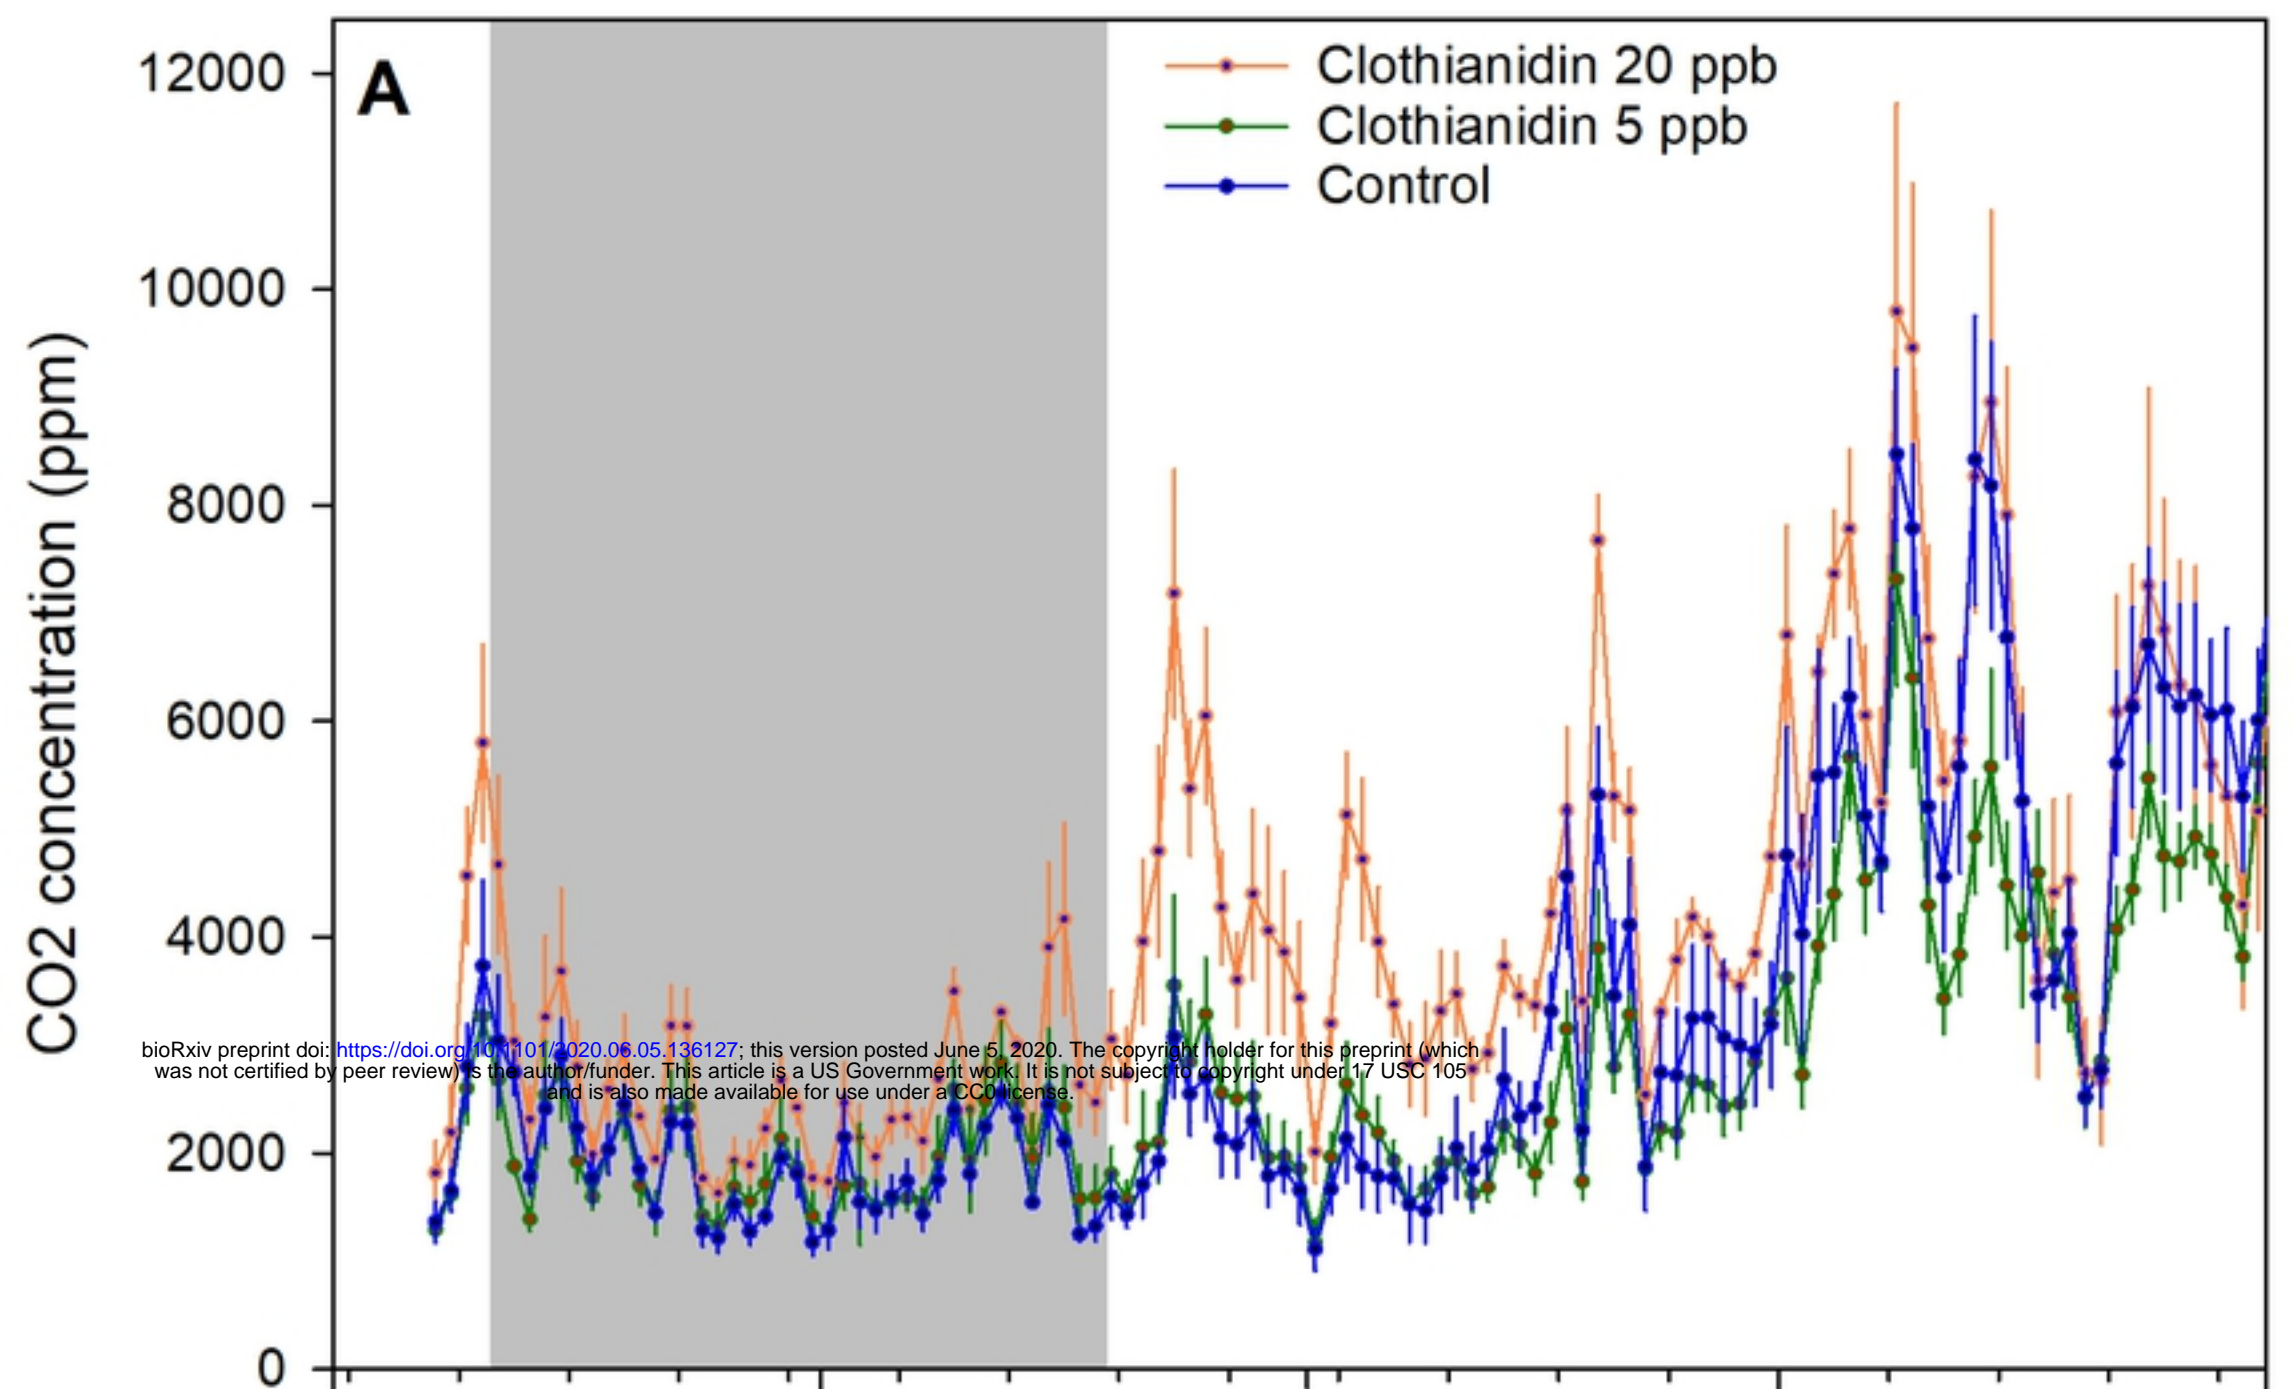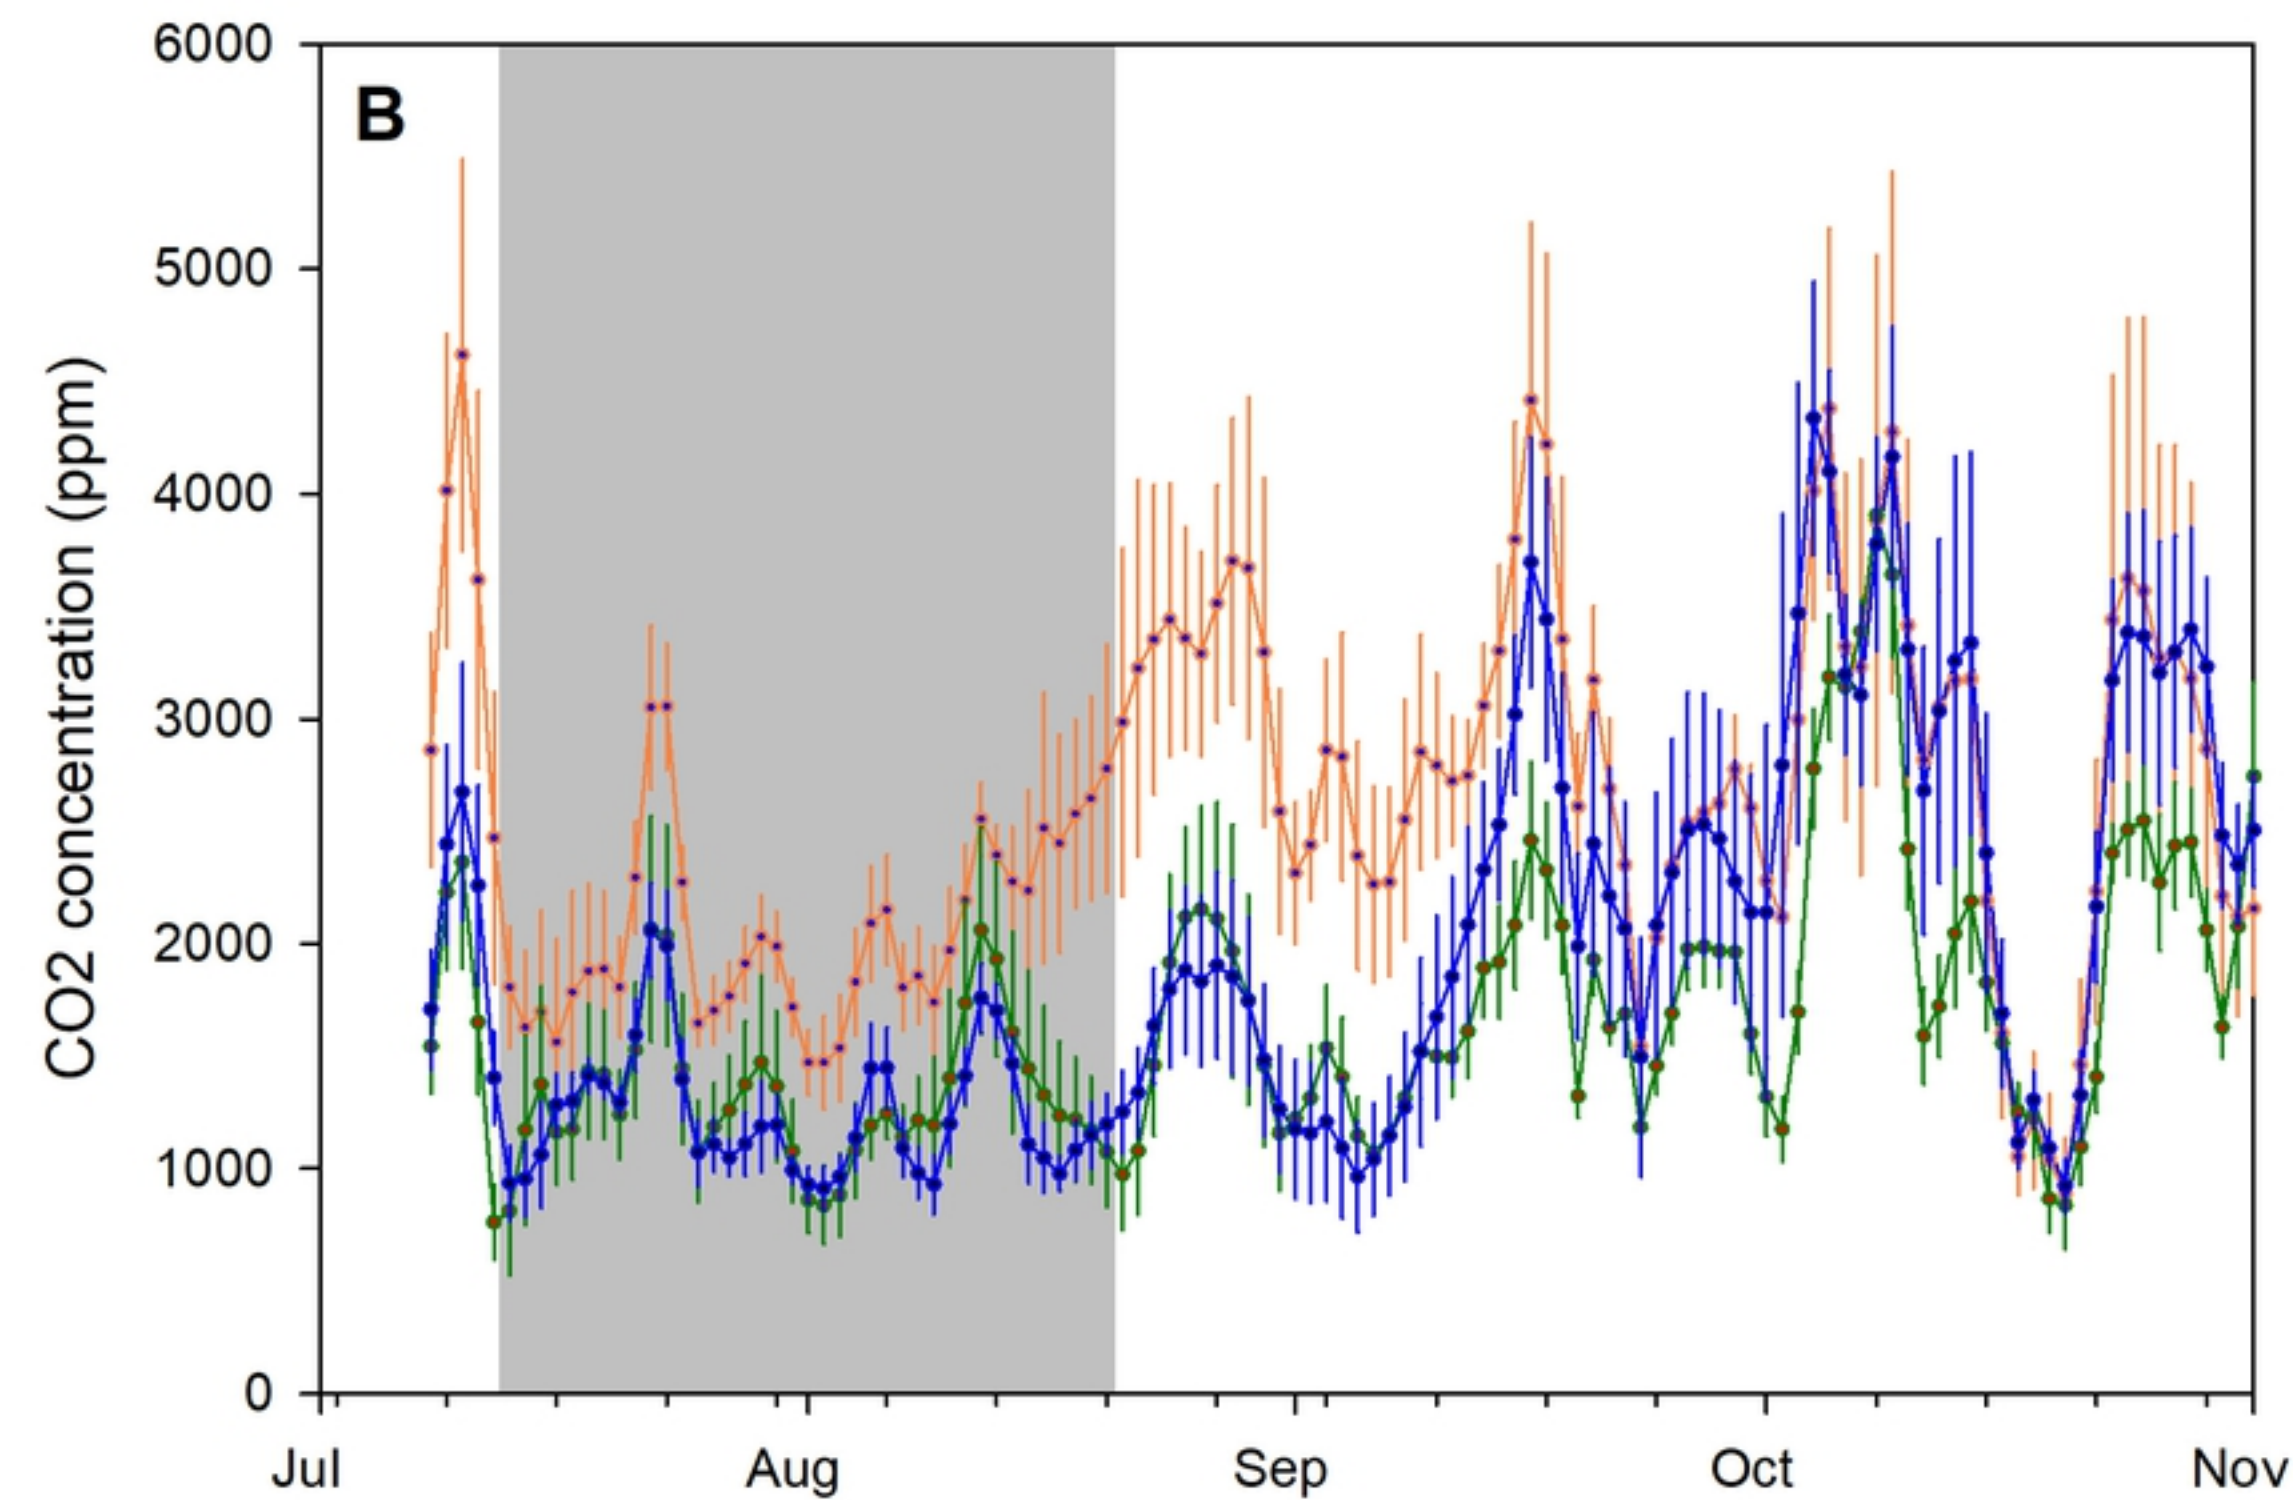

Figure 8
